1 Bank vole immunoheterogeneity may limit Nephropatia Epidemica emergence in a  
2 French non-endemic region

3

4 **Adélaïde Dubois**<sup>1,2</sup>, **Guillaume Castel**<sup>1</sup>, **Séverine Murri**<sup>2</sup>, **Coralie Pulido**<sup>3</sup>, **Jean-Baptiste**  
5 **Pons**<sup>4</sup>, **Laure Benoit**<sup>5</sup>, **Anne Loiseau**<sup>1</sup>, **Latifa Lakhdar**<sup>3</sup>, **Maxime Galan**<sup>1</sup>, **Philippe**  
6 **Marianneau**<sup>2†</sup>, **Nathalie Charbonnel**<sup>1†\*</sup>

7

8 <sup>1</sup> INRA, Centre de Biologie pour la Gestion des Populations, Montferrier sur Lez, France

9 <sup>2</sup> ANSES, Unité de Virologie, Laboratoire de Lyon, France

10 <sup>3</sup> ANSES, Plateforme d'Expérimentation Animale, Laboratoire de Lyon, France

11 <sup>4</sup> CNRS, Laboratoire de Biométrie et Biologie Evolutive, Villeurbanne, France

12 <sup>5</sup> CIRAD, Centre de Biologie pour la Gestion des Populations, Montferrier sur Lez, France

13 † These authors contributed equally to this work.

14

15 \*Corresponding author, contact information

16 Email address: [nathalie.charbonnel@inra.fr](mailto:nathalie.charbonnel@inra.fr)

17 Tel.: +33 (0)4 99 62 33 02; fax: +33 (0)4 99 62 33 45.

18

19 Note: Supplementary data associated with this article

20

21

22

23 **Abstract**

24 Ecoevolutionary processes affecting hosts, vectors and pathogens are important drivers of zoonotic  
25 disease emergence. In this study, we focused on nephropathia epidemica (NE), which is caused by  
26 Puumala hantavirus (PUUV) whose natural reservoir is the bank vole, *Myodes glareolus*. Despite  
27 the continuous distribution of the reservoir in Europe, PUUV occurrence is highly fragmented. We  
28 questioned the possibility of NE emergence in a French region that is considered to be NE-free but  
29 that is adjacent to a NE-endemic region. We first confirmed the epidemiology of these two regions  
30 using serological and virological surveys. We used bank vole population genetics to demonstrate  
31 the absence of spatial barriers that could have limited dispersal, and consequently, the spread of  
32 PUUV into the NE-free region. We next tested whether regional immunoheterogeneity could  
33 impact PUUV chances to establish, circulate and persist in the NE-free region. Immune  
34 responsiveness was phenotyped both in the wild and during experimental infections, using  
35 serological, virological and immune related gene expression assays. We showed that bank voles  
36 from the NE-free region were sensitive to experimental PUUV infection. We observed high levels  
37 of immunoheterogeneity between individuals and also between regions. In natural populations,  
38 antiviral gene expression (*Tnf* and *Mx2* genes) reached higher levels in bank voles from the NE-free  
39 region. During experimental infections, anti-PUUV antibody production was higher in bank voles  
40 from the NE endemic region. Altogether, our results indicated a lower susceptibility to PUUV for  
41 bank voles from this NE-free region, what might limit PUUV circulation and persistence, and in  
42 turn, the risk of NE.

43

## 44 Graphical abstract

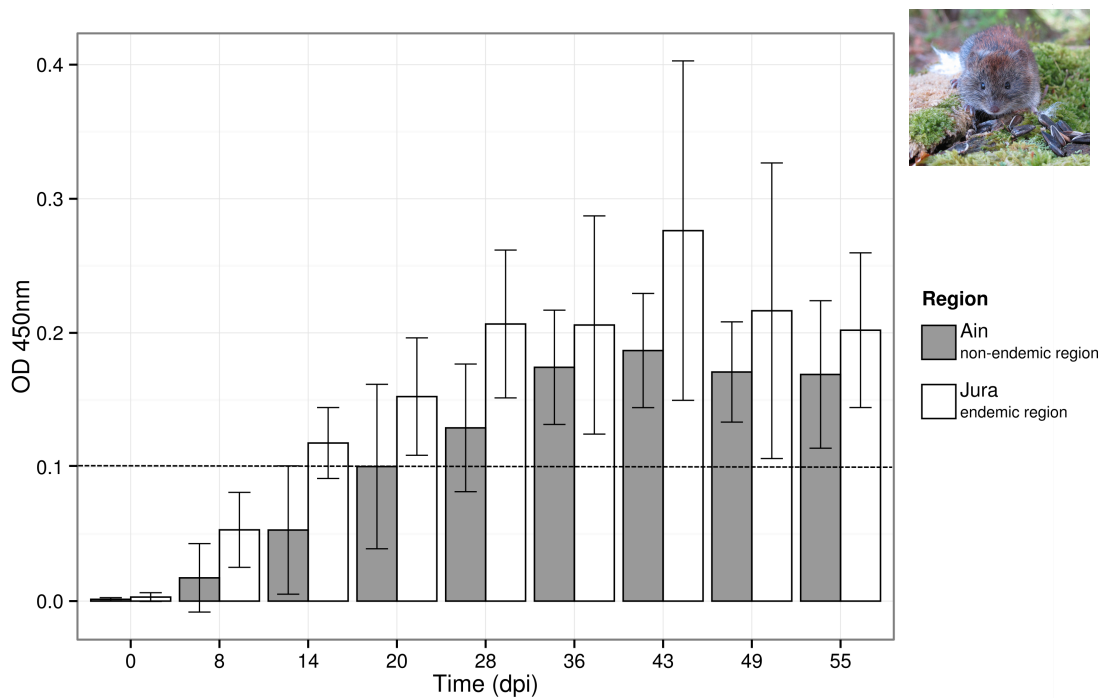

45

## 46 Keywords

47 *Myodes glareolus*; Rodent; Puumala hantavirus; Population genetics; Experimental infections;  
48 ecoimmunology

49

## 50 1. Introduction

51 Emerging infectious diseases (infections that have newly appeared in a population, or have  
52 existed but are rapidly increasing in incidence or geographic range, (Morse and Schluederberg,  
53 1990) have become an important public health threat these last decades (Daszak et al., 2000; King  
54 et al., 2006). The need for integrating evolutionary concepts to better understand and prevent them  
55 has recently been advocated (Vander Wal et al., 2014). Hence, hosts, vectors and pathogens evolve  
56 in response to environmental selective pressures but also as a result of inter-specific interactions,  
57 what, in turn, strongly impacts infectious disease dynamics and emergence.

58 Among important zoonotic (re-)emerging agents are hemorrhagic fever-causing hantaviruses of  
59 the Bunyaviridae family (Vapalahti et al., 2003). They are mainly rodent-borne (Henttonen et al.,  
60 2008) and are responsible for two kinds of human syndromes, hemorrhagic fever with renal  
61 syndrome (HFRS), mainly in Eurasia, and hantavirus cardiopulmonary syndrome (HCPS) in the  
62 Americas. For twenty years, since reliable tools for hantavirus infection diagnostics have become  
63 available, the (re-)emergence of zoonoses associated with hantaviruses has been recognized as a  
64 growing public health concern worldwide. In Europe, an increase in amplitude and frequency of  
65 epidemics due to hantaviruses has been observed these last 20 years (Heyman et al., 2011).  
66 Moreover, the geographic distribution of hantaviruses is expanding (e.g. for Seoul virus Jameson et  
67 al., 2013; Mace et al., 2013). Although this may be potentially and partly explained by increased  
68 clinician awareness and easier access to diagnostic tests, a significant rise in the real number of  
69 human cases is very likely (Heyman et al., 2012; Reynes et al., 2015). In France, Puumala virus  
70 (PUUV) is the main agent of hantavirus infections. It induces an attenuated form of HFRS called  
71 nephropathia epidemica (NE). PUUV is transmitted to humans via aerosols contaminated by excreta  
72 of its unique and specific natural reservoir host, the bank vole *Myodes glareolus*, which is a forest  
73 dwelling rodent species (Brummer-Korvenkotio et al., 1982). Although *M. glareolus* exhibits a  
74 spatially continuous distribution all over France, except on the Mediterranean coast, human cases  
75 are mostly being reported in the northeast part of the country (National Reference Center for  
76 Hantavirus <http://www.pasteur.fr/fr/sante/centres-nationaux-reference/les-cnr/hantavirus>, but see  
77 Reynes et al., 2015). Elsewhere, PUUV can be absent or the prevalence of PUUV in bank vole  
78 populations can reach high levels without any human case being reported yet (Castel et al., 2015).  
79 Niche modeling approaches based on climatic and environmental factors have been conducted to



80 better predict the spatial distribution of NE disease (Zeimes et al., 2015). They highlighted  
81 geographic areas of high risk of NE emergence, although neither seropositive bank voles nor human  
82 cases had been detected yet. They also failed to detect geographic areas with high levels of PUUV  
83 prevalence in reservoir populations and no human case reported. These results suggest that the  
84 drivers of NE emergence are just beginning to be elucidated, and that other important factors than  
85 abiotic ones, including evolutionary processes and PUUV and/or host genetic characteristics, could  
86 be relevant. In particular, selective pressures affecting host-pathogen interactions may promote the  
87 evolution of different defense strategies in hosts, ranging from resistance, *i.e.* the ability to reduce  
88 pathogen burden to tolerance, *i.e.* the ability to limit the damage caused by a given parasite burden  
89 (Schneider and Ayres, 2008; Raberg et al., 2009). Previous field and laboratory studies have  
90 revealed some variability in the susceptibility of bank voles to PUUV infection, as reflected by the  
91 probability to be infected with PUUV (Olsson et al., 2002; Kallio et al., 2006; Deter et al., 2008b;  
92 Dubois et al., 2017a) and the pattern of PUUV excretion once bank voles are infected (Hardestam et  
93 al., 2008; Voutilainen et al., 2015). Moreover, Guivier et al. (2010; 2014) have shown significant  
94 differences in the level of immune related gene expression in bank voles from NE endemic and  
95 non-endemic regions at the European and regional scales. It was suggested that this  
96 immunoheterogeneity could reflect some balance of resistance / tolerance to PUUV. Indeed PUUV  
97 infection in bank vole is chronic and mainly asymptomatic (but see Tersago et al., 2012) and  
98 mounting immune responses is energetically costly and can induce immunopathologies (e.g. in  
99 human infections, Vaheri et al., 2013). Guivier et al. (2010; 2014) therefore proposed that bank  
100 voles from NE endemic areas would be more tolerant to the virus as a result of co-adaptation  
101 whereas those from NE non-endemic ones would be more resistant.

102 In this context, we proposed to investigate the hypothesis that immunoheterogeneity between  
103 bank vole populations could influence the geographic distribution range of PUUV, using two  
104 complementary approaches, natural population surveys and experimental infections. We focused on  
105 bank vole populations settled on both parts of the southern limit of PUUV distribution in France  
106 (Fig. 1), *i.e.* in the NE endemic area (human cases regularly reported, Jura, see National Reference  
107 Center for Hantavirus data) and in the NE non-endemic area (no human case ever reported yet, Ain).  
108 Our first objective was to discard the possibility of a spatial barrier that could prevent or limit the  
109 transmission of PUUV from the Jura to the Ain bank vole populations. Our second objective was to

110 test the assumption of an important regional immunoheterogeneity between bank vole populations  
111 that could reflect different levels of sensitivity to PUUV infection. We predicted bank voles from  
112 Ain to be less sensitive to PUUV infection than those from Jura. Under this hypothesis, we  
113 expected bank voles from Ain to exhibit lower probability of infection and higher levels of immune  
114 responses to PUUV infection, hence reflecting their higher levels of resistance to this hantavirus.

115

## 116 **2. Material and methods**

### 117 *2.1. Ethical statement*

118 All animal works have been conducted according to the French and European regulations on care  
119 and protection of laboratory animals (French Law 2001-486 issued on June 6, 2001 and Directive  
120 2010/63/EU issued on September 22, 2010). Experimental protocols have been evaluated and  
121 approved by the Animal Ethics Committee C2EA-16 (ANSES/ENVA/UPEC, CNREEA n°16).

122

### 123 *2.2. Natural population studies*

#### 124 *2.2.1. Rodent sampling*

125 Bank voles were trapped in June and September 2014 in two adjacent regions of eastern France  
126 that have contrasted status in regard of human cases of NE. Jura is considered as an endemic zone  
127 as NE cases are regularly reported (National Reference Center for Hantavirus) whereas Ain is  
128 considered to be non-endemic as human case has never been reported yet (Fig. 1). These two areas  
129 are part of the same geological massif (Sommaruga, 1997) and they experience highly similar  
130 climatic conditions (WorldClim data, Supplementary Fig. 1).

131 Six sites were sampled in mixed forest of coniferous and deciduous tree species (Fig. 1, Table 1).  
132 The minimum distance between sites was 8.7 km. Six to ten lines of 20 live-traps (INRA) with  
133 about five meters interval were set up so that each sampling site consisted of a few km<sup>2</sup> area. Traps  
134 were baited with sunflower seeds. Each trap was geolocated. The traps were checked daily and  
135 early in the morning. Trapping session per site lasted at least three nights so that a minimum of 35  
136 voles were caught.

137 Once trapped, animals were bled through retro-orbital sinus, killed by cervical dislocation,  
138 weighed, measured, sexed and dissected. Whole blood was stored at 4°C until centrifugation to  
139 collect sera 24 hours later. Sera, lungs and urine were immediately placed in dry ice and then stored

140 at -80°C for virological and immunological analyses. Spleens were placed in RNAlater solution  
141 (Sigma) at 4°C during one night then stored at -20°C for population genetics and gene expression  
142 analyses.

143

#### 144 2.2.2. *Microsatellite genotyping*

145 Genomic DNA was extracted from a piece of spleen using the the EZ-10 96-Well Plate Genomic  
146 DNA Isolation Kit for Animal (BioBasic) according to manufacturer's instructions, with a final  
147 elution of 400µL in elution buffer. Genotyping was performed at 19 unlinked microsatellites loci  
148 previously published by Rikalainen et al. (2008) using primers and cycling conditions described in  
149 Guivier et al. (2011) using an ABI3130 automated DNA sequencer (Applied Biosystems). Alleles  
150 were scored using GENEMAPPER software (Applied Biosystems).

151

#### 152 2.2.3. *Serological and virological analyses*

153 Serum samples were screened by IgG ELISA as described in Klingstrom et al. (2002). Due to the  
154 high cross-reactivity between the different hantavirus serotypes (Kruger et al., 2001), the plates  
155 were coated with Tula virus infected and non-infected cell lysates. Previous experiments have  
156 shown that anti-PUUV positive and negative sera reacted similarly with lysates of PUUV and  
157 TULV infected cells and with recombinant PUUV nucleocapsid protein (Dubois et al., 2017a).

158 Viral RNA was extracted from serum, lung and liver, which are target organs for PUUV  
159 (Gavrilovskaya et al., 1983; Bernshtein et al., 1999), and urine, as it is a main route of excretion for  
160 PUUV (Hardestam et al., 2008), using the QIAamp Viral Mini Kit (Qiagen). Quantitative RT-PCR  
161 (qRT-PCR) were performed using 2.5µL of viral RNA amplified using the SuperScript III One-Step  
162 RT-PCR system with Platinum Taq High Fidelity (Invitrogen) on LightCycler 480 (Roche  
163 Diagnostics) as described in Suppl. Table S1. Relative amounts of viral RNA (expressed in RNA  
164 copy per mg of tissue or per µl of liquid) were calculated using a standard curve obtained with *in*  
165 *vitro* transcribed RNA. All samples were tested in duplicate to avoid false positives and negatives.

166

#### 167 2.2.4. *Immunological analyses*

168 We quantified gene expression for three candidate immune related genes, namely *Tlr7*, *Tnf-α* and  
169 *Mx2*, that are relevant with regard to PUUV infections (Rohfritsch et al., 2013; Charbonnel et al.,

170 2014; Dubois et al., 2017b). TLR7 is a receptor to virus and is probably involved in the detection of  
171 ssRNA viruses like hantaviruses (Bowie and Haga, 2005). The proinflammatory cytokine tumor  
172 necrosis factor alpha (TNF) and the antiviral protein Mx2 are known to limit PUUV replication in  
173 humans and in cell cultures (Kanerva et al., 1996; Temonen et al., 1996; Jin et al., 2001). We used  
174 *β-actin* as the endogenous reference gene, as previously validated by Friberg et al. (2011) in wood  
175 mice.

176 We analysed a subset of 170 bank voles including 10 adult PUUV-seropositive individuals and a  
177 number of PUUV-seronegative individuals that enabled to reach about 30 voles per site with an  
178 equal sex ratio. Total RNA was extracted from a piece of spleen using the NucleoSpin© 96 RNA  
179 kit (Macherey-Nagel) following manufacturer's instructions. As secondary lymphoid organ, the  
180 spleen has important immune functions and is the site of low levels of PUUV replication (Korva et  
181 al., 2009). RNA extractions were electrophoresed on 1.5% agarose gels and visualized using  
182 ethidium bromide staining to check for quality, then total RNA concentrations were measured using  
183 a NanoDrop 8000 spectrophotometers (Thermo Scientific) and normalized to 200 ng/μL using  
184 RNase free water. For *β-actin*, *Tnf-α* and *Mx2*, we used specific primers described in previous  
185 studies (Guivier et al., 2010; Guivier et al., 2014). For *Tlr7*, we designed the following specific  
186 primers based on the cDNA consensus sequences obtained for 12 *M. glareolus* samples (GenBank  
187 Accession Numbers: KX463605 - KX463616): Tlr7-Mg2-F  
188 (5'-TACCAGGACAGCCAGTTCTA-3'), Tlr7-Mg2-R (5'-GCCTCTGATGGGACAGATA-3').  
189 We generated cDNA from 4 μL of extracted RNA (800 ng per reaction), in a 20 μL reaction, using  
190 the Improm-II Reverse Transcription System (Promega), according to the conditions specified by  
191 the manufacturer for oligo (dT)15 primers. We performed a quantitative PCR on a LightCycler 480  
192 (Roche Diagnostics), using the 384-multiwell plate format, as previously described in Guivier et al.  
193 (2010; 2014). PCR efficiencies were estimated using the LinRegPCR software (Ruijter et al., 2009).  
194 Candidate gene mRNA relative expression levels were estimated for each sample using the method  
195 developed by Pfaffl (2001).

196

### 197 2.3. Experimental studies

#### 198 2.3.1. Rodent sampling

199 Bank voles were trapped in May 2015 in two sites already sampled in 2014 (Cormaranche forest

200 in Ain and Arbois forest in Jura) and using the same sampling protocol as described above. They  
201 were brought back to the laboratory, tested for the presence of anti-PUUV IgG, held during three  
202 weeks in quarantine and then retested for the presence of anti-PUUV IgG. Ten voles from Ain and  
203 nine voles from Jura, all of them being seronegative, were transferred in a ABSL-3 capacity and  
204 held individually in ISOcages N (Tecniplast). Food and water were provided *ad libitum*, with fresh  
205 vegetables once a week.

206

### 207 2.3.2. *Experimental infections*

208  $1.7 \times 10^3$  f.f.u of PUUV Sotkamo strain 1:10 diluted in DMEM (ThermoFisher Scientific) were  
209 injected by subcutaneous route in each of the 19 bank voles. From 7 to 55 days post-infection (*dpi*),  
210 blood, saliva and feces were collected once a week for each bank vole. We did not succeed  
211 collecting urine samples. Approximately 200 $\mu$ L of whole blood was sampled through the  
212 retro-orbital sinus and stored at 4°C until centrifugation to collect sera 24 hours later. Saliva was  
213 collected using sterile swabs subsequently placed in 300 $\mu$ L of Hank's Balanced Salt Solution (Life  
214 Technologies) and vortexed for 10 seconds. Feces were sampled directly from the anus. All samples  
215 were stored at -80°C until analyses. At the end of the experiment (55 *dpi*), all the bank voles were  
216 euthanized by cervical dislocation. Blood, lungs, liver, kidneys, urine and feces were collected and  
217 stored at -80°C until analyzes. Three bank voles, two from Ain and one from Jura, died during the  
218 course of experimental infection (at 28 *dpi*) and were not considered for further analyzes.

219

### 220 2.3.3. *Serological and virological analyses*

221 PUUV IgG detection was performed on sera as described in 2.2.2. Viral RNA was extracted  
222 from all samples (sera, lung, liver, kidney, feces, saliva and urine) and PUUV RNA detection was  
223 realized using qRT-PCR for all the samples as described earlier. To improve the sensitivity of viral  
224 detection, nested RT-PCR were applied to sera, feces and saliva, using the Titan One Tube RT-PCR  
225 System (Roche) and Taq DNA Polymerase (Qiagen).

226 Gene expression could not be performed on bank voles from this experiment as spleens could  
227 only be collected at 55 *dpi*. It was too far from the infection to expect any difference in gene  
228 expression between bank voles (Hardestam et al., 2008; Schountz et al., 2012), and it did not enable  
229 to study gene expression kinetics.

230

## 231 2.4. Statistical analyses

### 232 2.4.1. Natural population analyses

233 We analysed the genetic structure of bank vole populations using microsatellite data. We tested  
234 the conformity to Hardy-Weinberg equilibrium (HWE) for each locus and each population. We  
235 analyzed linkage disequilibrium (LD) for each pair of loci using GENEPOP v4.2 (Raymond and  
236 Rousset, 1995). Corrections for multiple tests were performed using the false discovery rate (FDR)  
237 approach as described in Benjamini and Hochberg (1995). We described the spatial genetic  
238 structure by estimating the genetic differentiation between each pair of sites using Weir and  
239 Cockerham's pairwise  $F_{ST}$  estimates (1984). Significance was assessed using exact tests and FDR  
240 corrections. Several complementary analyses were performed to test for the existence of spatial  
241 barriers that could limit vole dispersal in this area, especially between Jura and Ain. We first  
242 computed a discriminant analysis of principal components (DAPC), which is a multivariate,  
243 model-free approach to clustering (Jombart et al., 2010). Because DAPC is sensitive to the number  
244 of principal components used in analysis, we used the function *optim.a.score* to select the correct  
245 number of principal components. We next performed an analysis of molecular variance (AMOVA)  
246 in Arlequin v3.5.1.2 (Excoffier and Lischer, 2010). Compared to the DAPC, it enabled to test  
247 specifically for genetic differences between regions, considering the potential variability between  
248 sites within each region. Finally models of isolation by distance (IBD) were applied to test for  
249 geographic-genetic correlations. IBD models were analyzed independently for each region and for  
250 the whole dataset, so that disruption of gene flow between regions could also be detected. Genetic  
251 differentiation was estimated for each pair of individuals and Mantel tests were applied to test for a  
252 correlation between matrices of genetic differentiation and of Euclidean distances between  
253 individuals, using 10000 permutations, in GENEPOP. We also calculated confidence intervals for the  
254 slope of the regression line by bootstrapping over loci (ABC intervals, Di Ciccio and Efron, 1996).

255 We tested for variations of serological and immunological characteristics in natural populations  
256 between regions using generalized linear mixed models with the GLMER function implemented in  
257 the LME4 package for R 3.1.0 (R Core Team, 2013). The fixed variables included in the models  
258 were *region*, *sex* and *weight* and all pairwise interactions. When they were non-significant, they  
259 were removed from the model. The factor *site* was included as a random factor. Chi-square tests

260 with Bonferroni correction were applied to analyze the effect of significant variables using the  
261 package PHIA for R. We analysed independently PUUV serological status (using a binomial  
262 response variable) and each gene expression level  $Q_n$  (using a log-transformed response variable  
263 for the three genes). To prevent confounding effects due to the potential induction of the three  
264 candidate genes expression following PUUV infection, we limited our statistical analyses to  
265 PUUV-seronegative bank voles (Guivier et al., 2014).

266

#### 267 2.4.2. Experimentation analyses

268 We tested for regional differences in bank vole responses to PUUV experimental infection by  
269 examining the levels of anti-PUUV IgG ( $OD_{450nm}$ , using a normal response variable) between Jura  
270 and Ain through time. Generalized mixed linear models were applied as described above. The fixed  
271 variables included in the models were *region*, *dpi* and their interaction. Bank vole identity was  
272 included as a random effect. Possible variation in the level of viral RNA between regions was tested  
273 using a linear model with the fixed effect *region*.

274

### 275 3. Results

#### 276 3.1. Natural population studies

##### 277 3.1.1. Population genetic structure

278 Three loci, Cg16H5, Cg16E4 and Cg6G11, were excluded from the genetic analyses due to the  
279 poor quality profiles obtained. Six bank voles were also excluded because they could not be  
280 amplified for most loci. Two other microsatellite loci, Cg2F2 and Cg3F12, showed deviations of  
281 HWE in four and six sites respectively, suggesting the presence of null alleles. They were removed  
282 from further analyses. Five out of 84 tests for deviation from HWE were significant with a different  
283 loci involved each time. 25 of 546 pairs of loci (4.58%) exhibited significant linkage disequilibrium  
284 but the loci involved were not consistent among sites. Thus, our final dataset included 271 bank  
285 voles genotyped at 14 microsatellites loci.

286 Spatial pairwise  $F_{ST}$  ranged between 0.009 and 0.03. All of these estimates were significant after  
287 FDR correction (Table 2). DAPC clustering showed that the genetic variation of the six sites  
288 overlapped (Fig. 2), although the first discriminant component tended to slightly separate the two  
289 regions. The second discriminant component revealed that one site in Jura (Mignovillard) tended to



290 be different from the three others and that the two sites in Ain tended to be separated from each  
291 other (Fig. 2). AMOVA analyses revealed an absence of significant differentiation between the two  
292 regions, and significant variation between sites within regions (Table 3). IBD patterns were highly  
293 significant whatever the dataset considered. Genetic differentiation between bank voles decreased  
294 with spatial distance, and the slope of these regressions were similar, respectively 0.003, 0.004 and  
295 0.005 for Ain, Jura and the whole dataset, confirming an absence of spatial barrier between the two  
296 regions (Table 4).

297

### 298 *3.1.2. Variations of serological, virological and immunological features in natural populations*

299 277 bank voles were trapped in the six sites surveyed (Table 1). Among them, 12 captured in  
300 Jura were PUUV seropositive. Two of these individuals had very low OD. Moreover, they had a  
301 low body mass, so that we thought they were juveniles carrying maternal antibodies and not PUUV  
302 infected individuals (weight lower than 17.5g, see Voutilainen et al., 2016). They were therefore  
303 excluded from further analyses. None of the bank vole captured in Ain was PUUV seropositive.  
304 Seroprevalence levels in Jura sites ranged between 7.1 % and 10.0 %, except in Mignovillard where  
305 no PUUV seropositive bank vole was detected. The best model that explained bank vole serological  
306 status only included *weight* ( $X^2_1 = 5.541$ ,  $p = 0.019$ ). Heavier bank voles were more likely to be  
307 PUUV seropositive.

308 The serum, lung, liver and urine of the 10 adult seropositive individuals were tested using  
309 qRT-PCR. Three sera were PUUV negative and the seven other samples showed viral RNA ranging  
310 between  $1.01e4$  and  $1.58e5$  copies.mg<sup>-1</sup>. The viral RNA load in the lung and liver ranged  
311 respectively between  $7.50e6$  and  $4.88e9$  copies.mg<sup>-1</sup>, and  $1.79e6$  and  $8.63e8$  copies.mg<sup>-1</sup> (Suppl.  
312 Table S2). Urine samples could be collected for only five of these 10 adult bank voles. Two of these  
313 excreta were PUUV positive as their quantitative RT-PCR cycle thresholds,  $C_T$ , were lower than 35  
314 cycles. The viral load ranged between  $2.08e4$  and  $2.26e4$  copies.mg<sup>-1</sup>.

315 Extreme values of gene expression levels were detected for the three candidate genes (60%  
316 higher than the other values). The models were run with or without these extreme values. *Mx2* gene  
317 model revealed a significant difference between regions (without outliers:  $X^2_1 = 4.56$ ,  $p = 0.033$ ;  
318 with outliers:  $X^2_1 = 6.00$ ,  $p = 0.01$  Fig. 3a). Bank voles from Ain over-expressed *Mx2* compared to  
319 those from Jura. *Tlr7* gene model included the variable *sex* (without outliers:  $X^2_1 = 13.67$ ,  $p = 2.10^{-4}$ ;



320 with outliers  $X^2_1 = 7.80$ ,  $p = 0.005$ , Fig. 3b), with higher values of *Tlr7* expression detected in  
321 females than in males. When including outliers, *Tnf- $\alpha$*  gene model revealed a significant effect of  
322 *region*, *weight* ( $X^2_1 = 9.173$ ,  $p = 0.002$ ;  $X^2_1 = 4.474$ ,  $p = 0.034$ ; respectively, Figs. 3 c, d) and of the  
323 interaction *sex \* region* ( $X^2_1 = 5.783$ ,  $p = 0.016$ ). *Tnf- $\alpha$*  expression was higher in bank voles from  
324 Ain than those from Jura. This effect was stronger when considering males only. These results have  
325 to be taken cautiously as they turned to be non-significant when the outliers were not included in  
326 the model. Then we only found a significant effect of *weight* ( $X^2_1 = 11.50$ ,  $p = 6.10^{-4}$ ), with heavier  
327 bank voles exhibiting higher levels of *Tnf- $\alpha$*  expression than lighter ones.

328

### 329 3.2 Variations of serological and virological features during experimental infections

330 Three bank voles died before the end of the experiment and were not considered in the analyses.  
331 Among the 16 remaining bank voles experimentally infected with PUUV (eight from Ain and 8  
332 from Jura), 14 seroconverted by the end of the study. The two bank voles that did not seroconvert at  
333 the end of the experiment (55 *dpi*) originated from Ain (Suppl. Table S3). Considering bank voles  
334 that seroconverted, our model showed a lower  $OD_{450nm}$  in voles from Ain than those from Jura ( $X^2_1$   
335 = 4.126,  $p = 0.042$ , see Fig. 4), and a significant variation of  $OD_{450nm}$  through time ( $X^2_1 = 195.129$ ,  $p$   
336 =  $2.10^{-16}$ ).

337 Viral RNA was detected by qRT-PCR in the sera of a single bank vole from Ain at 14 and 20 *dpi*.  
338 Nested RT-PCR allowed detecting PUUV RNA at 8 *dpi* in the sera of two bank voles from Ain and  
339 of four bank voles from Jura (Suppl. Table S4). In addition, PUUV RNA could not be detected in  
340 any feces or saliva samples tested using qRT-PCR or nested RT-PCR.

341 At the end of the experiment (55 *dpi*), viral RNA was detected by qRT-PCR in the lungs of 13  
342 bank voles (including one that did not seroconvert) over the 16 infected during the experiment. The  
343 relative amount of PUUV RNA ranged between  $4.34e5$  and  $4.07e7$  RNA copies.  $mg^{-1}$  (Suppl. Table  
344 S5). The statistical model revealed that PUUV viral load in lungs did not vary between the two  
345 regions. The amounts of viral RNA detected in the other organs were lower and concerned less  
346 individuals, in particular in liver : only four individuals showed positive results, and less than  
347  $3.07e6$  RNA copies.  $mg^{-1}$  were detected (Suppl. Table S5). Finally, no viral RNA could be detected  
348 in saliva or urine samples collected at 55 *dpi*, and only two bank voles (one from each region) had  
349 PUUV RNA in their feces (Suppl. Table S5).

350 Finally, our results revealed a strong inter-individual variability in the serological / virological  
351 relationships. All bank voles but one that seroconverted had at least one organ/excreta with viral  
352 RNA at 55 *dpi*. Moreover, one bank vole that had not seroconverted at 55 *dpi* exhibited viral RNA  
353 in its lungs and kidneys (Suppl. Table S5).

354

#### 355 **4. Discussion**

##### 356 *4.1 – Contrasted PUUV epidemiological situations between the French regions Ain and Jura*

357 To our knowledge, this is the first bank vole serological study ever conducted in the French Ain  
358 region with regard to PUUV. It is probably because no NE case had been reported there yet  
359 (National Reference Center for Hantaviruses) and PUUV studies remained focused on endemic  
360 areas. Deepening our understanding of infectious disease emergence requires to broaden our  
361 research out of the areas where diseases are well described, to better identify the factors limiting or  
362 facilitating emergence success (e.g. for plague in Madagascar Gascuel et al., 2013; Tollenaere et al.,  
363 2013). None of the 90 bank voles captured in Ain during this field survey was seropositive for  
364 PUUV antibodies. This result tends to confirm the absence of PUUV circulation in these bank vole  
365 populations, or at such a low level that it can not be detected using ecological surveys. An extensive  
366 survey in more sites or in different years could still be performed to assert more firmly the absence  
367 of PUUV circulation in bank vole populations settled south from Jura. In the opposite, and as  
368 expected from the existence of known NE cases, we found PUUV seropositive bank voles in all but  
369 one site from Jura. Seroprevalence levels were very similar to those observed in the Ardennes  
370 epidemic region or in previous studies conducted in Jura (ranging from 0 to 18%, Guivier et al.,  
371 2011; Deter et al., 2008a). Although no bank vole from Mignovillard forest had anti-PUUV  
372 antibodies, we know from previous studies that PUUV may circulate in this site (Deter et al.,  
373 2008a). The existence of these two adjacent regions with contrasted epidemiological situations with  
374 regard to PUUV reinforced the need to better assess the risk of PUUV emergence and persistence in  
375 Ain. It emphasized the necessity to question whether PUUV infected bank voles from Jura could  
376 migrate to Ain, thus enhancing the chance for PUUV to be introduced there, and whether PUUV  
377 could persist in bank vole populations from Ain once introduced.

378

##### 379 *4.2 – High bank vole gene flow between the two French regions Ain and Jura*

380 We developed a population genetic approach to evaluate the possibility that a spatial barrier  
381 could prevent bank vole gene flow from Jura to Ain, what would limit the chance of PUUV  
382 introduction in this latter region through the dispersal of infected animals. Indeed PUUV is  
383 transmitted directly between bank voles, from contaminated excreta or through bites, without any  
384 vector (Korpela and Lähdevirta, 1978; Yanagihara et al., 1985). PUUV introduction from one site to  
385 another may therefore strongly result from the introduction of an infected bank vole, either through  
386 wood transport or natural dispersal. For example, Guivier et al. (2011) showed that despite frequent  
387 local extinction of PUUV in hedge networks, the virus was frequently re-introduced in these  
388 habitats through the emigration of seropositive bank voles coming from close forests.

389 Our results revealed weak spatial genetic structure between sites and regions, with levels of  
390 genetic differentiation ranging between 1 and 3%. These estimates are very similar to the levels of  
391 genetic differentiation observed in previous studies conducted at the same geographical scale on  
392 bank voles using the same genetic markers (Guivier et al., 2011) or on other rodent species  
393 (*Arvicola scherman*, Berthier et al., 2005). These results revealed high population size and / or high  
394 gene flow between populations (Wright, 1951). We did not find any signature of disrupted gene  
395 flow between bank voles from the two regions. The spatial structure observed was mainly due to  
396 isolation by distance, *i.e.* migration rates being inversely proportional to the geographic distance  
397 between populations. This pattern is also frequently observed in micromammals, including rodents,  
398 when studied at this geographical scale (Aars et al., 2006; Berthier et al., 2006; Bryja et al., 2007).  
399 The fact that the rates of isolation by distance did not differ within region and over the whole  
400 dataset corroborated the hypothesis of an absence of spatial barrier disrupting gene flow between  
401 Jura and Ain. As such, the possibility for PUUV infected bank voles to disperse from Jura to Ain,  
402 and consequently, the possibility for PUUV introduction in Ain seemed likely.

403 Considering this possibility, the reason why PUUV, which is known to circulate in Jura since the  
404 early 2000's, has not reached the Ain NE-free region needs to be questioned. It could be explained  
405 by the low progression of PUUV from northern to southern populations, and the emergence of NE  
406 in Ain would only be a question of time. It could also be due to differences in metapopulation  
407 functioning between bank vole populations in Ain and Jura. Higher genetic drift, lower migration  
408 rates between populations could account for lower probability of PUUV persistence in Ain (Guivier  
409 et al., 2011). However, we did not find any evidence supporting this hypothesis based on the

410 population genetic analyses conducted using microsatellites. We therefore explored the possibility  
411 that bank voles from Ain and Jura could present different levels of sensitivity to PUUV infections,  
412 that would in turn lead to contrasted PUUV epidemiology in these two regions.

413

#### 414 *4.3 – High levels of immunoheterogeneity between bank voles*

415 The assessment of immunological variations in wild populations has recently been at the core of  
416 eco-epidemiological studies, enabling the analysis of their environmental and evolutionary causes  
417 as well as the prediction of their epidemiological consequences (Jackson et al., 2011). Here we  
418 described strong individual variability of bank vole immune responses from both natural population  
419 survey and experimental infections. In the wild, susceptibility, defined here as the probability of  
420 being infected with PUUV, strongly depended on the weight of bank voles, which is a proxy for age  
421 and/or body condition. Heavier/older bank voles are likely to disperse more than younger ones and  
422 have accumulated more opportunities to be exposed to PUUV (see for details Voutilainen et al.,  
423 2016). In addition, these heavier/older bank voles could also suffer from immunosuppression due to  
424 high levels of corticosterone associated with breeding or to decreased body condition (Beldomenico  
425 et al., 2008). Moreover, we revealed variable amounts of viral RNA between bank voles, for all  
426 organs and excretas considered, what may result from differences in the time since infection or  
427 individual characteristics. The low number of animals that could be handled in highly secured  
428 animal facilities (ABSL3) did not enable to test the impact of individual factors on the probability  
429 of getting infected and on their specific sensitivity. Nevertheless, the experiments conducted  
430 allowed controlling for PUUV strain or quantity injected, and some variability was still detected  
431 both in anti-PUUV antibody production (*e.g.* 2 out of 16 bank voles did not seroconvert 55 days  
432 post-infection) and in the amount of viral RNA detected in organs and excretas. It was therefore  
433 relevant to analyse whether immune responsiveness also differed between bank voles. Considering  
434 three immune related candidate genes, namely *Tlr7*, *Mx2* and *Tnf- $\alpha$* , we found that sex was an  
435 important factor mediating inter-individual immunoheterogeneity. In the wild, females  
436 over-expressed *Tlr7* gene compared to males. These observations corroborated common patterns  
437 observed in vertebrates showing that females are more immunocompetent than males (Klein and  
438 Flanagan, 2016). Indeed, TLR7 is involved in the recognition of diverse viruses (Heil et al., 2004;  
439 Lund et al., 2004) and impaired expression and signaling by TLR7 may contribute to reduced innate

440 immune responses during chronic viral infections (Hirsch et al., 2010). The sexual dimorphism in  
441 *Tlr7* gene expression is observed in bank voles for the first time. This gene is linked to the X  
442 chromosome, and it belongs to the 15% of X-linked genes escaping inactivation and being  
443 expressed from both the active and inactive X chromosome (Plath et al., 2002). This could explain  
444 the over-expression of *Tlr7* gene observed in females compared to males. Surprisingly, we did not  
445 find any evidence of higher levels of *Tnf- $\alpha$*  gene expression in female compared to male bank voles,  
446 as was previously detected by Guivier et al. (2014). Higher expression levels were even detected in  
447 males compared to females in the region Ain. This pattern was driven by three bank voles with  
448 extreme values, that might correspond to recently infected males and blur the general picture  
449 observed in the Ardennes (Guivier et al., 2014). Altogether, this high inter-individual  
450 immunoheterogeneity, which was observed in the wild and confirmed when performing  
451 experimental infections, is important with regard to PUUV epidemiology as it highlighted bank  
452 voles with increased likelihood of being infected, excreting and further transmitting the virus (e.g.  
453 super-spreaders, Lloyd-Smith et al., 2005).

454

455 *4.4. Regional bank vole immunoheterogeneity - an explanation for the contrasted PUUV*  
456 *epidemiology observed in adjacent French regions ?*

457 Evidence of immunoheterogeneity was found between Jura and Ain, two regions with contrasted  
458 NE epidemiological statuses. It concerned several immune pathways, including the antiviral and  
459 adaptative immune responses of bank voles to PUUV infections. Bank voles from Ain mounted  
460 lower levels of anti-PUUV antibodies than those from Jura during PUUV experimental infections.  
461 Unfortunately, this regional pattern could hardly be interpreted in terms of rodent sensitivity to  
462 PUUV as the role of IgG during hantavirus infections remains unclear (review in Schonrich et al.,  
463 2008). Indeed, the presence of IgG can protect rodents from subsequent challenges but does not  
464 participate in eliminating the virus (review in Easterbrook and Klein, 2008; Schountz and Prescott,  
465 2014). The similar amounts of viral RNA observed in bank voles from Ain and Jura at the end of  
466 the experiment could support the hypothesis that sensitivity to PUUV did not differ between these  
467 two regions. However, this result has to be taken cautiously as it is likely that variability in virus  
468 replication and excretion might only be visible sooner after the infection (Hardestam et al., 2008;  
469 Dubois et al., 2017a). Because we observed more bank voles from Jura than Ain with PUUV RNA

470 in their sera eight days after the infection, we can not refute the possibility of a regional  
471 heterogeneity in sensitivity to PUUV.

472 The immune-related gene expression analyses conducted using wild bank voles also provide  
473 arguments in favor of this hypothesis. Rodents from Ain over-expressed *Mx2* and *Tnf- $\alpha$*  genes  
474 compared to bank voles from Jura. These results are congruent with previous studies conducted in  
475 the French Ardennes and over Europe (Guivier et al., 2010; Guivier et al., 2014). These immune  
476 related genes were chosen to represent some of the main pathways underlying bank vole immune  
477 responses to PUUV infections. They encode respectively for TNF, a proinflammatory cytokine and  
478 *Mx2*, an antiviral protein, that both limit PUUV replication (Kanerva et al., 1996; Temonen et al.,  
479 1996; Jin et al., 2001). Besides, the overproduction of these molecules could induce  
480 immunopathologies (Li and Youssoufian, 1997; Wenzel et al., 2005; Bradley, 2008), what could  
481 drive a balance of resistance / tolerance to PUUV (Guivier et al., 2010; Guivier et al., 2014).  
482 Altogether these regional differences in bank vole responses to PUUV could reflect potential  
483 divergence with respect to resistance and tolerance strategies. These differences may be mediated  
484 by a subset of individuals within populations, as suggested by bank voles exhibiting extreme values  
485 of immune related gene expression and mostly explaining the significant differences observed.  
486 Within population evolution from resistance to tolerance has previously been demonstrated in an  
487 unmanaged population of Soay sheep (Hayward et al., 2014) and in wild populations of field voles  
488 (Jackson et al., 2014). Further assessment of bank vole health and fitness would be required to  
489 confirm this hypothesis of tolerant and resistant phenotypes with regard to PUUV infections  
490 (Raberg et al., 2009). It would also be interesting to address the issue of potential physiological  
491 trade-offs between inflammatory and antibody-mediated responses (Lee and Klasing, 2004). The  
492 patterns observed in this study could suggest that bank voles from the NE endemic region would  
493 promote an adaptative immunity in response to PUUV infection instead of a more costly and  
494 potentially damaging inflammatory response, potentially as a result of co-adaptation between bank  
495 vole and PUUV (Easterbrook and Klein, 2008).

496

## 497 **Conclusions**

498 This study highlighted the importance of combining natural population surveys and experimental  
499 approaches in addressing questions related to immunoheterogeneity and its potential consequences



500 for epidemiological questions. Here the natural population survey enabled to study a large number  
501 of animals and to describe inter-individual and inter-population variability in immune  
502 responsiveness, that may further blur the results obtained from experimental infections. Besides, the  
503 experiments enabled to control for the time since exposure to PUUV and to follow immune  
504 responses kinetics. The diverse array of eco-evolutionary approaches developed here brought  
505 important answers to evaluate the global risk of NE emergence in a non endemic region. Our results  
506 supported the possibility for PUUV introduction in the region Ain via the dispersal of PUUV  
507 seropositive bank voles from Jura. They also indicated the possibility of PUUV circulation in this  
508 non endemic region as experimental infections revealed that bank voles from Ain are sensitive to  
509 PUUV. Therefore, NE emergence in this region might only be a question of time. But several  
510 arguments also indicated that PUUV persistence might be unlikely. Lower susceptibility to PUUV  
511 could account for the absence or low number of PUUV infected bank voles in the Ain region, and  
512 also potentially for the weak level of PUUV excretion in the environment. Further investigations are  
513 now required to identify the mechanisms underlying bank vole immunoheterogeneity between  
514 adjacent NE endemic and non endemic regions, in particular with regard to abiotic (e.g. climate,  
515 resource availability) or biotic conditions (e.g. spatially varying pathogen communities, see for the  
516 bank vole Behnke et al., 2001; Ribas Salvador et al., 2011; Razzauti-Feliu et al., 2015; Loxton et al.,  
517 2016). Sociological and human behavioral factors would then be the ultimate step to analyse what  
518 limits PUUV transmission between *M. glareolus* and humans.

519

## 520 **Acknowledgements**

521 Data used in this work were partly produced through the genotyping and sequencing facilities of  
522 ISEM (Institut des Sciences de l'Evolution-Montpellier) and Labex CeMEB (Centre Méditerranéen  
523 Environnement Biodiversité). We are grateful to EU grants GOCE-CT-2003- 010284 EDEN and  
524 FP7-261504 EDENext, that have partially funded this research. A. Dubois PhD was funded by an  
525 INRA-EFPA / ANSES fellowship.

526

## 527 **References**

528 Aars, J., Dallas, J.F., Piertney, S.B., Marshall, F., Gow, J.L., Telfer, S., Lambin, X., 2006.  
529 Widespread gene flow and high genetic variability in populations of water voles *Arvicola*

- 530 *terrestris* in patchy habitats. *Mol. Ecol.* 15, 1455-1466.
- 531 Behnke, J.M., Barnard, C.J., Bajer, A., Bray, D., Dinmore, J., Frake, K., Osmond, J., Race, T.,  
532 Sinski, E., 2001. Variation in the helminth community structure in bank voles (*Clethrionomys*  
533 *glareolus*) from three comparable localities in the Mazury Lake District region of Poland.  
534 *Parasitol.* 123, 401-414.
- 535 Beldomenico, P.M., Telfer, S., Gebert, S., Lukomski, L., Bennett, M., Begon, M., 2008. Poor  
536 condition and infection: a vicious circle in natural populations. *P. R. Soc. Lond. B* 275,  
537 1753-1759.
- 538 Benjamini, Y., Hochberg, Y., 1995. Controlling the false discovery rate: a practical and powerful  
539 approach to multiple testing. *J. R. Stat. Soc. B* 57, 289-300.
- 540 Bernshtein, A.D., Apekina, N.S., Mikhailova, T.V., Myasnikov, Y.A., Khlyap, L.A., Korotkov,  
541 Y.S., Gavrilovskaya, I.N., 1999. Dynamics of Puumala hantavirus infection in naturally infected  
542 bank voles (*Clethrionomys glareolus*). *Arch. Virol.* 144, 2415-2428.
- 543 Berthier, K., Charbonnel, N., Galan, M., Chaval, Y., Cosson, J.F., 2006. Migration and maintenance  
544 of genetic variability in cyclic vole populations : a spatio-temporal study. *Mol. Ecol.* 15, 2665–  
545 2676.
- 546 Berthier, K., Galan, M., Foltete, J.C., Charbonnel, N., Cosson, J.F., 2005. Genetic structure of the  
547 cyclic fossorial water vole (*Arvicola terrestris*): landscape and demographic influences. *Mol.*  
548 *Ecol.* 14, 2861-2871.
- 549 Bowie, A.G., Haga, I.R., 2005. The role of Toll-like receptors in the host response to viruses. *Mol.*  
550 *Immunol.* 42, 859-867.
- 551 Bradley, J.R., 2008. TNF-mediated inflammatory disease. *J. Pathol.* 214, 149-160.
- 552 Brummer-Korvenkotio, M., Henttonen, H., Vaheri, A., 1982. Hemorrhagic fever with renal  
553 syndrome in Finland: Ecology and virology of nephropathia epidemica. *Scand. Journal of Infect.*  
554 *Dis.* 36, 88-89.
- 555 Bryja, J., Charbonnel, N., Berthier, K., Galan, M., Cosson, J.F., 2007. Density-related changes in  
556 selection pattern for major histocompatibility complex genes in fluctuating populations of voles.  
557 *Mol. Ecol.* 16, 5084-5097.
- 558 Castel, G., Couteaudier, M., Sauvage, F., Pons, J.B., Murri, S., Plyusnina, A., Pontier, D., Cosson,  
559 J.F., Plyusnin, A., Marianneau, P., Tordo, N., 2015. Complete genome and phylogeny of



- 560 Puumala hantavirus isolates circulating in France. *Viruses* 7, 5476-5488.
- 561 Charbonnel, N., Pagès, M., Sironen, T., Henttonen, H., Vapalahti, O., Mustonen, J., Vaheri, A.,  
562 2014. Immunogenetic factors affecting susceptibility of humans and rodents to hantaviruses and  
563 the clinical course of hantaviral disease in humans. *Viruses* 6, 2214-2241.
- 564 Daszak, P., Cunningham, A.A., Hyatt, A.D., 2000. Emerging infectious diseases of wildlife - threats  
565 to biodiversity and human health. *Science* 287, 443-449.
- 566 Deter, J., Chaval, Y., Galan, M., Gauffre, B., Morand, S., Henttonen, H., Laakkonen, J., Voutilainen,  
567 L., Charbonnel, N., Cosson, J.F., 2008a. Kinship, dispersal and hantavirus transmission in bank  
568 and common voles. *Arch. Virol.* 153, 435-444.
- 569 Deter, J., Chaval, Y., Galan, M., Henttonen, H., Laakkonen, J., Voutilainen, L., Ribas Salvador, A.,  
570 Bryja, J., Morand, S., Cosson, J.F., Charbonnel, N., 2008b. Association between the DQA MHC  
571 class II gene and Puumala virus infection in the specific reservoir *Myodes glareolus*. *Inf. Genet.*  
572 *Evol.* 8, 450-458.
- 573 Di Ciccio, T.J., Efron, B., 1996. Bootstrap confidence intervals. *Stat. Sci.* 11, 189-228.
- 574 Dubois, A., Castel, G., Murri, S., Pulido, C., Pons, J.B., Benoit, L., Loiseau, A., Lakhdar, L., Galan,  
575 M., Charbonnel, N., Marianneau, P., 2017a. Experimental infections of wild bank voles (*Myodes*  
576 *glareolus*) from nephropatia epidemica endemic and non-endemic regions revealed slight  
577 differences in Puumala virological course and immunological responses. *Virus Res.*
- 578 Dubois, A., Galan, M., Guivier, E., Henttonen, H., Voutilainen, L., Razzauti, M., Gauffre, B.,  
579 Marianneau, P., Cosson, J.F., Charbonnel, N., 2017b. Microevolution of bank voles (*Myodes*  
580 *glareolus*) at neutral and immune related genes during a multi-annual complete dynamic cycle :  
581 consequences for Puumala hantavirus epidemiology. *Inf. Genet. Evol.* 49, 318–329.
- 582 Easterbrook, J.D., Klein, S.L., 2008. Seoul virus enhances regulatory and reduces proinflammatory  
583 responses in male Norway rats. *J. Med. Virol.* 80, 1308-1318.
- 584 Excoffier, L., Lischer, H.E.L., 2010. Arlequin suite ver 3.5: a new series of programs to perform  
585 population genetics analyses under Linux and Windows. *Mol. Ecol. Res.* 10, 564-567.
- 586 Friberg, I.M., Lowe, A., Ralli, C., Bradley, J.E., Jackson, J.A., 2011. Temporal anomalies in  
587 immunological gene expression in a time series of wild mice: signature of an epidemic? *PLoS*  
588 *One* 6.
- 589 Gascuel, F., Choisy, M., Duplantier, J.M., Debarre, F., Brouat, C., 2013. Host resistance, population

- 590 structure and the long-term persistence of bubonic plague: Contributions of a modelling  
591 approach in the malagasy focus. *Plos Comput. Biol.* 9, e1003039.
- 592 Gavrilovskaya, I.N., Chumakov, M.P., Apekina, N.S., Ryltseva, E.V., Martiyanova, L.I.,  
593 Gorbachkova, E.A., Bernshtein, A.D., Zakharova, M.A., Boiko, V.A., 1983. Adaptation to  
594 laboratory and wild animals of the haemorrhagic fever with renal syndrome virus present in the  
595 foci of European U.S.S.R. *Arch. Virol.* 77, 87-90.
- 596 Guivier, E., Galan, M., Chaval, Y., Xuereb, A., Ribas Salvador, A., Poulle, M.L., Charbonnel, N.,  
597 Cosson, J.F., 2011. Landscape genetics highlights the role of bank vole metapopulation  
598 dynamics in the epidemiology of Puumala hantavirus. *Mol. Ecol.* 20, 3569-3583.
- 599 Guivier, E., Galan, M., Henttonen, H., Cosson, J.F., Charbonnel, N., 2014. Landscape features and  
600 helminth co-infection shape bank vole immunoheterogeneity, with consequences for Puumala  
601 virus epidemiology. *Heredity* 112, 274-281.
- 602 Guivier, E., Galan, M., Ribas Salvador, A., Xuéreb, A., Chaval, Y., Olsson, G., Essbauer, S.,  
603 Henttonen, H., Voutilainen, L., Cosson, J.F., Charbonnel, N., 2010. Tnf- $\alpha$  expression and  
604 promoter sequences reflect the balance of tolerance/resistance to Puumala virus infection in  
605 European bank vole populations. *Inf. Genet. Evol.* 10, 1208-1217.
- 606 Hardestam, J., Karlsson, M., Falk, K.I., Olsson, G., Klingström, J., Lundkvist, A., 2008. Puumala  
607 hantavirus excretion kinetics in bank voles (*Myodes glareolus*). *Emerg. Infect. Dis.* 14,  
608 1209-1215.
- 609 Hayward, A.D., Nussey, D.H., Wilson, A.J., Berenos, C., Pilkington, J.G., Watt, K.A., Pemberton,  
610 J.M., Graham, A.L., 2014. Natural selection on individual variation in tolerance of  
611 gastrointestinal nematode infection. *PLoS Biology* 12, e1001917.
- 612 Heil, F., Hemmi, H., Hochrein, H., Ampenberger, F., Kirschning, C., Akira, S., Lipford, G., Wagner,  
613 H., Bauer, S., 2004. Species-specific recognition of single-stranded RNA via toll-like receptor 7  
614 and 8. *Science* 303, 1526–1529.
- 615 Henttonen, H., Buchy, P., Suputtamongkol, Y., Jittapalapong, S., Herbreteau, V., Laakkonen, J.,  
616 Chaval, Y., Galan, M., Dobigny, G., Charbonnel, N., Michaux, J., Cosson, J.F., Morand, S.,  
617 Hugot, J.P., 2008. Recent discoveries of new hantaviruses widen their range and question their  
618 origins, in: Sparagano, O.A.E., Maillard, J.C., Figueroa, J.V. (Eds.), *Animal biodiversity and  
619 emerging diseases: prediction and prevention*. Blackwell Publishing, Oxford, pp. 84-89.

- 620 Heyman, P., Ceianu, C.S., Christova, I., Tordo, N., Beersma, M., Joao Alves, M., Lundkvist, A.,  
621 Hukic, M., Papa, A., Tenorio, A., Zelena, H., Essbauer, S., Visontai, I., Golovljova, I., Connell,  
622 J., Nicoletti, L., Van Esbroeck, M., Gjeruldsen Dudman, S., Aberle, S.W., Avsic-Zupanc, T.,  
623 Korukluoglu, G., Nowakowska, A., Klempa, B., Ulrich, R.G., Bino, S., Engler, O., Opp, M.,  
624 Vaheri, A., 2011. A five-year perspective on the situation of haemorrhagic fever with renal  
625 syndrome and status of the hantavirus reservoirs in Europe, 2005-2010. *Eurosurveillance* 16.
- 626 Heyman, P., Thoma, B.R., Marie, J.L., Cochez, C., Essbauer, S.S., 2012. In search for factors that  
627 drive hantavirus epidemics. *Front. Physiol.* 3, 237.
- 628 Hirsch, I., Caux, C., Hasan, U., Bendriss-Vermare, N., Olive, D., 2010. Impaired Toll-like receptor  
629 7 and 9 signaling : from chronic viral infections to cancer. *Trends Immunol.* 31, 391-397.
- 630 Jackson, J.A., Begon, M., Birtles, R., Paterson, S., Friberg, I.M., Hall, A., Ralli, C., Turner, A.,  
631 Zawadzka, M., Bradley, J.E., 2011. The analysis of immunological profiles in wild animals: a  
632 case study on immunodynamics in the field vole, *Microtus agrestis*. *Mol. Ecol.* 20, 893-909.
- 633 Jackson, J.A., Hall, A.J., Friberg, I.M., Ralli, C., Lowe, A., Zawadzka, M., Turner, A.K., Stewart,  
634 A., Birtles, R.J., Paterson, S., Bradley, J.E., Begon, M., 2014. An immunological marker of  
635 tolerance to infection in wild rodents. *PLoS Biol.* 12, e1001901.
- 636 Jameson, L.H., Logue, C.H., Atkinson, B., Baker, B., Galbraith, S.E., Carroll, M.W., Brooks, T.,  
637 Hewson, R., 2013. The continued emergence of hantaviruses: isolation of a Seoul virus  
638 implicated in human disease, United Kingdom, October 2012. *Eurosurveillance* 18.
- 639 Jin, H.K., Yoshimatsu, K., Takada, A., Ogino, M., Asano, A., Arikawa, J., Watanabe, T., 2001.  
640 Mouse Mx2 protein inhibits hantavirus but not influenza virus replication. *Arch. Virol.* 146,  
641 41-49.
- 642 Jombart, T., Devillard, S., Balloux, F., 2010. Discriminant analysis of principal components: a new  
643 method for the analysis of genetically structured populations. *BMC Genet.* 11, 94.
- 644 Kallio, E.R., Klingström, J., Gustafsson, E., Manni, T., Vaheri, A., Henttonen, H., Vapalahti, O.,  
645 Lundkvist, A., 2006. Prolonged survival of Puumala hantavirus outside the host: evidence for  
646 indirect transmission via the environment. *J. Gen. Virol.* 87, 2127-2134.
- 647 Kanerva, M., Melen, K., Vaheri, A., Julkunen, I., 1996. Inhibition of Puumala and Tula  
648 hantaviruses in vero cells by MxA protein. *Virol.* 224, 55-62.
- 649 King, D.A., Peckham, C., Waage, J.K., Brownlie, J., Woolhouse, M.E., 2006. *Epidemiology.*

- 650 Infectious diseases: preparing for the future. *Science* 313, 1392-1393.
- 651 Klein, S.L., Flanagan, K.L., 2016. Sex differences in immune responses. *Nat. Rev. Immunol.* 16,  
652 626-638.
- 653 Klingstrom, J., Heyman, P., Escutenaire, S., Sjolander, K.B., De Jaegere, F., Henttonen, H.,  
654 Lundkvist, A., 2002. Rodent host specificity of European hantaviruses: evidence of Puumala  
655 virus interspecific spillover. *J. Med. Virol.* 68, 581-588.
- 656 Korpela, H., Lähdevirta, J., 1978. The role of small rodents and patterns of living in the  
657 epidemiology of nephropathia epidemica. *Scand. J. Infect. Dis.* 10, 303-305.
- 658 Korva, M., Duh, D., Saksida, A., Trilar, T., Avsic-Zupanc, T., 2009. The hantaviral load in tissues  
659 of naturally infected rodents. *Microb. Infect.* 11, 344-351.
- 660 Kruger, D.H., Ulrich, R., Lundkvist, Å., 2001. Hantavirus infections and their prevention. *Microb.*  
661 *Infect.* 3, 1129-1144.
- 662 Lee, K.A., Klasing, K.C., 2004. A role for immunology in invasion biology. *Trends Ecol. Evol.* 19,  
663 523-529.
- 664 Li, Y.L., Youssoufian, H., 1997. MxA overexpression reveals a common genetic link in four  
665 Fanconi anemia complementation groups. *J. Clin. Invest.* 100, 2873-2880.
- 666 Lloyd-Smith, J.O., Cross, P.C., Briggs, C.J., Daugherty, M., Getz, W.M., Latto, J., Sanchez, M.S.,  
667 Smith, A.B., Swei, A., 2005. Should we expect population thresholds for wildlife disease?  
668 *Trends Ecol. Evol.* 20, 511-519.
- 669 Loxton, K.C., Lawton, C., Stafford, P., Holland, C.V., 2016. Reduced helminth parasitism in the  
670 introduced bank vole (*Myodes glareolus*): More parasites lost than gained. *Int. J. Parasitol.* 5,  
671 175-183.
- 672 Lund, J.M., Alexopoulou, L., Sato, A., Karow, M., Adams, N.C., Gale, N.W., Iwasaki, A., Flavell,  
673 R.A., 2004. Recognition of single-stranded RNA viruses by Toll-like receptor 7. *P. Nat. Acad.*  
674 *Sci. USA* 101, 5598-5603.
- 675 Mace, G., Feyeux, C., Mollard, N., Chantegret, C., Audia, S., Rebibou, J.M., Spagnolo, G., Bour,  
676 J.B., Denoyel, G.A., Sagot, P., Reynes, J.M., 2013. Severe Seoul hantavirus infection in a  
677 pregnant woman, France, October 2012. *Eurosurveillance* 18, 14-17.
- 678 Morse, S.S., Schluederberg, A., 1990. Emerging viruses: the evolution of viruses and viral diseases.  
679 *J. Infect. Dis.* 162, 1-7.

- 680 Olsson, G.E., White, N., Ahlm, C., Elgh, F., Verlemyr, A.C., Juto, P., Palo, R.T., 2002.  
681 Demographic factors associated with hantavirus infection in bank voles (*Clethrionomys*  
682 *glareolus*). *Emerg. Infect. Dis.* 8, 924-929.
- 683 Pfaffl, M.W., 2001. A new mathematical model for relative quantification in real-time RT-PCR.  
684 *Nucl. Ac. Res.* 29.
- 685 Plath, K., Mlynarczyk-Evans, S., Nusinow, D.A., Panning, B., 2002. Xist RNA and the mechanism  
686 of X chromosome inactivation. *Annu. Rev. Genet.* 36, 233-278.
- 687 Raberg, L., Graham, A.L., Read, A.F., 2009. Decomposing health: tolerance and resistance to  
688 parasites in animals. *Philos. Trans. R. Soc. B-Biol. Sci.* 364, 37-49.
- 689 Raymond, M., Rousset, F., 1995. Genepop version 3: population genetics software for exact tests  
690 and ecumenicism. *J. Heredity* 86, 248-249.
- 691 Razzauti-Feliu, M., Galan, M., Bernard, M., Maman, S., Klopp, C., Charbonnel, N.,  
692 Vayssier-Taussat, M., Eloit, M., Cosson, J.F., 2015. Comparison of next-generation sequencing  
693 approaches surveying bacterial pathogens in wildlife. *Plos Negl. Trop. Dis.* 9, e0003929.
- 694 Reynes, J.M., Dutrop, C.M., Carli, D., Levast, M., Fontaine, N., Denoyel, G.A., Philit, J.B., 2015.  
695 Puumala hantavirus infection in Isere: Geographic extension of this zoonosis in France. *Med.*  
696 *Malad. Infect.* 45, 177-180.
- 697 Ribas Salvador, A., Guivier, E., Xuereb, A., Chaval, Y., Cadet, P., Poulle, M.L., Sironen, T.,  
698 Voutilainen, L., Henttonen, H., Cosson, J.F., Charbonnel, N., 2011. Concomitant influence of  
699 helminth infection and landscape on the distribution of Puumala hantavirus in its reservoir,  
700 *Myodes glareolus*. *BMC Microbiol.* 11.
- 701 Rikalainen, K., Grapputo, A., Knott, E., Koskela, E., Mappes, T., 2008. A large panel of novel  
702 microsatellite markers for the bank vole (*Myodes glareolus*). *Mol. Ecol. Res.* 8, 1164-1168.
- 703 Rohfritsch, A., Guivier, E., Galan, M., Chaval, Y., Charbonnel, N., 2013. Apport de  
704 l'immunogénétique à la compréhension des interactions entre le campagnol roussâtre *Myodes*  
705 *glareolus* et l'hantavirus Puumala. *Bull. Acad. Vet. France* 166, 165-176.
- 706 Ruijter, J.M., Ramakers, C., Hoogaars, W.M.H., Karlen, Y., Bakker, O., van den Hoff, M.J.B.,  
707 Moorman, A.F.M., 2009. Amplification efficiency: linking baseline and bias in the analysis of  
708 quantitative PCR data. *Nucl. Ac. Res.* 37.
- 709 Schneider, D.S., Ayres, J.S., 2008. Two ways to survive infection: what resistance and tolerance

- 710 can teach us about treating infectious diseases. *Nat. Rev. Immunol.* 8, 889-895.
- 711 Schonrich, G., Rang, A., Lutteke, N., Raftery, M.J., Charbonnel, N., Ulrich, R.G., 2008.  
712 Hantavirus-induced immunity in rodent reservoirs and humans. *Immunol. Rev.* 225, 163-189.
- 713 Schountz, T., Acuna-Retamar, M., Feinstein, S., Prescott, J., Torres-Perez, F., Podell, B., Peters, S.,  
714 Ye, C., Black, W.C., Hjelle, B., 2012. Kinetics of immune responses in deer mice experimentally  
715 infected with Sin Nombre Virus. *J. Virol.* 86, 10015-10027.
- 716 Schountz, T., Prescott, J., 2014. Hantavirus immunology of rodent reservoirs: current status and  
717 future directions. *Viruses* 6, 1317-1335.
- 718 Sommaruga, A., 1997. Geology of the Central Jura and the Molasse Basin, Institut de Géologie.  
719 Université de Neuchâtel, Neuchâtel, Suisse, p. 195.
- 720 Temonen, M., Mustonen, J., Helin, H., Pasternack, A., Vaehri, A., Holthofer, H., 1996. Cytokines,  
721 adhesion molecules, and cellular infiltration in nephropathia epidemica kidneys: An  
722 immunohistochemical study. *Clin. Immunol. Immunopathol.* 78, 47-55.
- 723 Tersago, K., Crespin, L., Verhagen, R., Leirs, H., 2012. Impact of Puumala virus infection on  
724 maturation and survival in bank voles: A capture-mark-recapture analysis. *J. Wildl. Dis.* 48,  
725 148-156.
- 726 Tollenaere, C., Jacquet, S., Ivanova, S., Loiseau, A., Duplantier, J.M., Streiff, R., Brouat, C., 2013.  
727 Beyond an AFLP genome scan towards the identification of immune genes involved in plague  
728 resistance in *Rattus rattus* from Madagascar. *Mol. Ecol.* 22, 354-367.
- 729 Vaehri, A., Strandin, T., Hepojoki, J., Sironen, T., Henttonen, H., Mäkelä, S., Mustonen, J., 2013.  
730 Uncovering the mysteries of hantavirus infections. *Nat. Rev. Microbiol.* 11, 539-550.
- 731 Vander Wal, E., Garant, D., Calmé, S., Chapman, C.A., Festa-Bianchet, M., Millien, V.,  
732 Rioux-Paquette, S., Pelletier, F., 2014. Applying evolutionary concepts to wildlife disease  
733 ecology and management. *Evol. Applic.* 7, 856-868.
- 734 Vapalahti, O., Mustonen, J., Lundkvist, A., Henttonen, H., Plyusnin, A., Vaehri, A., 2003.  
735 Hantavirus infections in Europe. *Lancet Inf. Dis.* 3, 653-661.
- 736 Voutilainen, L., Kallio, E.R., Niemimaa, J., Vapalahti, O., Henttonen, H., 2016. Temporal dynamics  
737 of Puumala hantavirus infection in cyclic populations of bank voles. *Sci. Rep.* 6, 21323.
- 738 Voutilainen, L., Sironen, T., Tonteri, E., Tuiskunen Back, A., Razzauti, M., Karlsson, M.,  
739 Wahlstrom, M., Niemimaa, J., Henttonen, H., Lundkvist, A., 2015. Life-long shedding of

- 740 Puumala hantavirus in wild bank voles (*Myodes glareolus*). J. Gen. Virol. 96, 1238-1247.
- 741 Weir, B., Cockerham, C., 1984. Estimating F-statistics for the analysis of population structure.  
742 Evolution 38, 1358-1370.
- 743 Wenzel, J., Uerlich, M., Haller, O., Bieber, T., Tueting, T., 2005. Enhanced type I interferon  
744 signaling and recruitment of chemokine receptor CXCR3-expressing lymphocytes into the skin  
745 following treatment with the TLR7-agonist imiquimod. J. Cutan. Pathol. 32, 257-262.
- 746 Wright, S., 1951. The genetical structure of populations. Ann. Eugenics 15, 323-354.
- 747 Yanagihara, R., Amyx, H.L., Gajdusek, D.C., 1985. Experimental infection with Puumala virus, the  
748 etiologic agent of nephropathia epidemica, in bank voles (*Clethrionomys glareolus*). J. Virol. 55,  
749 34–38.
- 750 Zeimes, C.B., Quoilin, S., Henttonen, H., Lyytikäinen, O., Vapalahti, O., Reynes, J.M., Reusken, C.,  
751 Swart, A.N., Vainio, K., Hjertqvist, M., Vanwambeke, S.O., 2015. Landscape and regional  
752 environmental analysis of the spatial distribution of hantavirus human cases in Europe. Front.  
753 Publ. Health 3, 1-10.
- 754
- 755
- 756
- 757



758 **Legends to Figures.**

759

760 **Fig. 1.** Map of the study area. Each color represents a site of trapping and each circle or diamond  
761 represents a trapping line. The location of the two regions (Jura and Ain) within France is shown on  
762 top left.

763

764 **Fig. 2.** Scatterplot of the first two principal components discriminating *M. glareolus* populations by  
765 sites using a discriminant analysis of principal components (DAPC) based on microsatellite data.  
766 Points represent individual observations. Envelops represent population membership. Bank vole  
767 populations from Ain (NE non-endemic region) are represented in green and those from Jura (NE  
768 endemic region) in blue.

769

770 **Fig. 3.** Variations of immunological characteristics in natural bank vole populations. a) Variations  
771 of *Mx2* gene expression between individuals of the two regions, Ain (NE non-endemic region) and  
772 Jura (NE endemic region). b) Variations of *Tlr7* gene expression between males and females. c) and  
773 d) Variations of *Tnf- $\alpha$*  gene expression between the two regions and between sex within the two  
774 regions.

775

776 **Fig. 4.** Variation of the optical density in ELISA test ( $OD_{450nm}$ ) over time for the 14 bank voles that  
777 seroconverted during the experimental infections. Barplots and error bars represent the mean  
778  $OD_{450nm}$  value  $\pm$  SD for all the individuals in each region. The hatched line represents the threshold  
779 above which the bank voles were considered to be PUUV seropositive.

780

781



**Table 1.**

## Sampling site characteristics

| Region        | Sites                   | Dates of sampling<br>(dd/mm/yyyy)     | Number of<br>captured voles | Number of infected voles<br>(Number of infected<br>juveniles) | Prevalence<br>(Prevalence without<br>juveniles) |
|---------------|-------------------------|---------------------------------------|-----------------------------|---------------------------------------------------------------|-------------------------------------------------|
| Ain           | Chatillon-en-Michailles | 28/08/2014 - 31/08/2014               | 44                          | 0                                                             | 0 %                                             |
| (non endemic) | Cormaranche-en-Bugey    | 01/09/2014 - 03/09/2014               | 46                          | 0                                                             | 0 %                                             |
|               | Chaux-des-Crotenay      | 12/06/2014 - 15/06/2014<br>23/08/2014 | 56                          | 4 (0)                                                         | 7.1 %                                           |
| Jura          | Mont-sous-Vaudrey       | 07/06/2014 - 10/06/2014               | 40                          | 4 (2)                                                         | 10.0 % (5 %)                                    |
| (endemic)     | Mignovillard            | 16/06/2014 - 18/06/2014               | 45                          | 0                                                             | 0 %                                             |
|               | Poligny                 | 24/08/2014 - 26/08/2014               | 46                          | 4 (0)                                                         | 8.7 %                                           |

**Table 2.**

$F_{st}$  estimates between sites per year (lower side) and associated  $p$ -values of Fisher exact tests (upper side).

|              | Vaudrey           | Crotenay           | Mignovillard       | Poligny            | Chatillon          | Cormaranche        |
|--------------|-------------------|--------------------|--------------------|--------------------|--------------------|--------------------|
| Vaudrey      |                   | < 10 <sup>-5</sup> | < 10 <sup>-5</sup> | < 10 <sup>-5</sup> | < 10 <sup>-5</sup> | < 10 <sup>-5</sup> |
| Crotenay     | <b>0.01676***</b> |                    | < 10 <sup>-5</sup> | < 10 <sup>-5</sup> | < 10 <sup>-5</sup> | < 10 <sup>-5</sup> |
| Mignovillard | <b>0.02296***</b> | <b>0.01887***</b>  |                    | < 10 <sup>-5</sup> | < 10 <sup>-5</sup> | < 10 <sup>-5</sup> |
| Poligny      | <b>0.01501***</b> | <b>0.00926***</b>  | <b>0.01453***</b>  |                    | < 10 <sup>-5</sup> | < 10 <sup>-5</sup> |
| Chatillon    | <b>0.02142***</b> | <b>0.01844***</b>  | <b>0.02279***</b>  | <b>0.02071***</b>  |                    | < 10 <sup>-5</sup> |
| Cormaranche  | <b>0.03116***</b> | <b>0.02501***</b>  | <b>0.02161***</b>  | <b>0.02388***</b>  | <b>0.01566***</b>  |                    |

Significant  $p$ -values are in bold; \*\*\*  $p \leq 0.001$

**Table 3.**

Results of the analysis of molecular variance (AMOVA). The AMOVA hierarchy was based on geographical features, comparing the two regions (Ain and Jura) and the sites within the regions.

| Source of variation        | <i>d.f.</i> | Variance of components | Percentage of variation | <i>p</i>                        |
|----------------------------|-------------|------------------------|-------------------------|---------------------------------|
| Among regions              | 1           | 0.04481                | 0.73                    | 0.068                           |
| Among sites within regions | 4           | 0.09903                | 1.61                    | <b>&lt; 10<sup>-5</sup> ***</b> |
| Within sites               | 536         | 6.00519                | 97.66                   | <b>&lt; 10<sup>-5</sup> ***</b> |

Significant *p*-values are in bold; \*\*\*  $p \leq 0.001$

1 **Table 4.**

2 Isolation by distance characteristics — probability (IBD  $p$ ), intercept and slope calculated for each region and for the whole dataset. 95% confidence  
3 intervals (CI) for the slope of the IBD were obtained by bootstrapping over the 14 microsatellite loci.

---

| Dataset      | IBD $p$                              | Intercept | Slope [95% CI]                     |
|--------------|--------------------------------------|-----------|------------------------------------|
| Ain          | <b>&lt; <math>10^{-5}</math> ***</b> | 0.043     | 0.003 [ $2 \cdot 10^{-5}$ , 0.006] |
| Jura         | <b>&lt; <math>10^{-5}</math> ***</b> | 0.059     | 0.004 [ $6 \cdot 10^{-4}$ , 0.009] |
| Ain and Jura | <b>&lt; <math>10^{-5}</math> ***</b> | 0.057     | 0.005 [0.003, 0.009]               |

---

4 Significant  $p$ -values are in bold; \*\*\*  $p \leq 0.001$

**Fig. 1.**

Map of the study area. Each color represents a site of trapping and each circle or diamond represents a trapping line. The location of the two regions (Jura and Ain) within France is shown on top left.

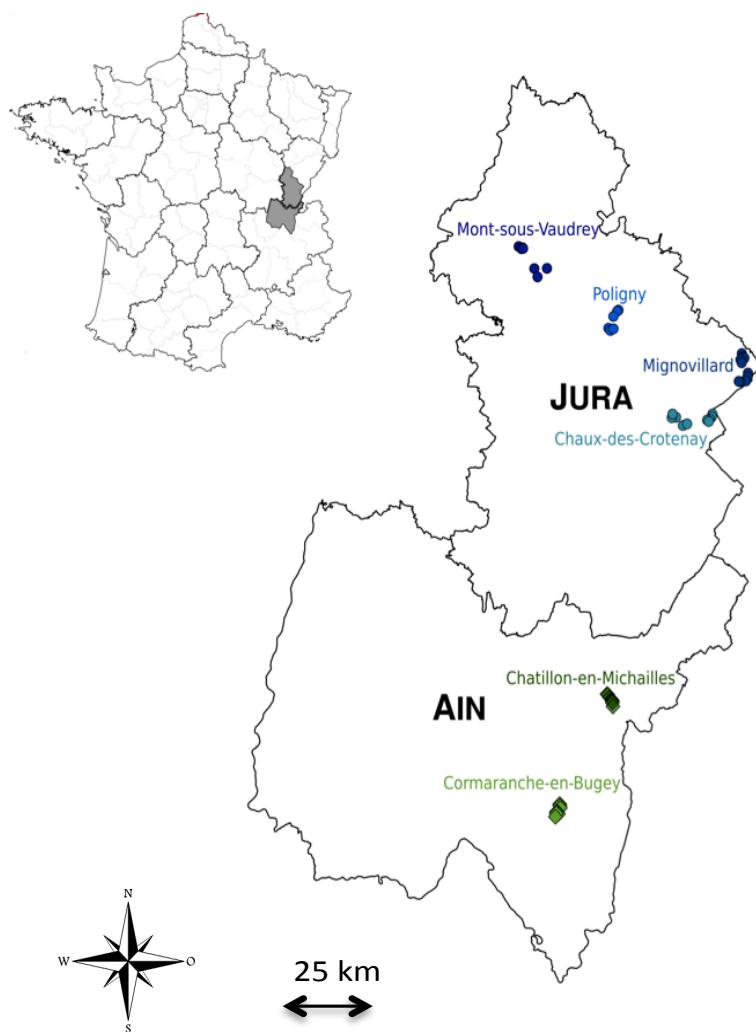

**Fig. 2.**

Scatterplot of the first two principal components discriminating *M. glareolus* populations by sites using a discriminant analysis of principal components (DAPC) based on microsatellite data. Points represent individual observations. Envelops represent population membership. Bank vole populations from Ain (NE non-endemic region) are represented in green and those from Jura (NE endemic region) in blue.

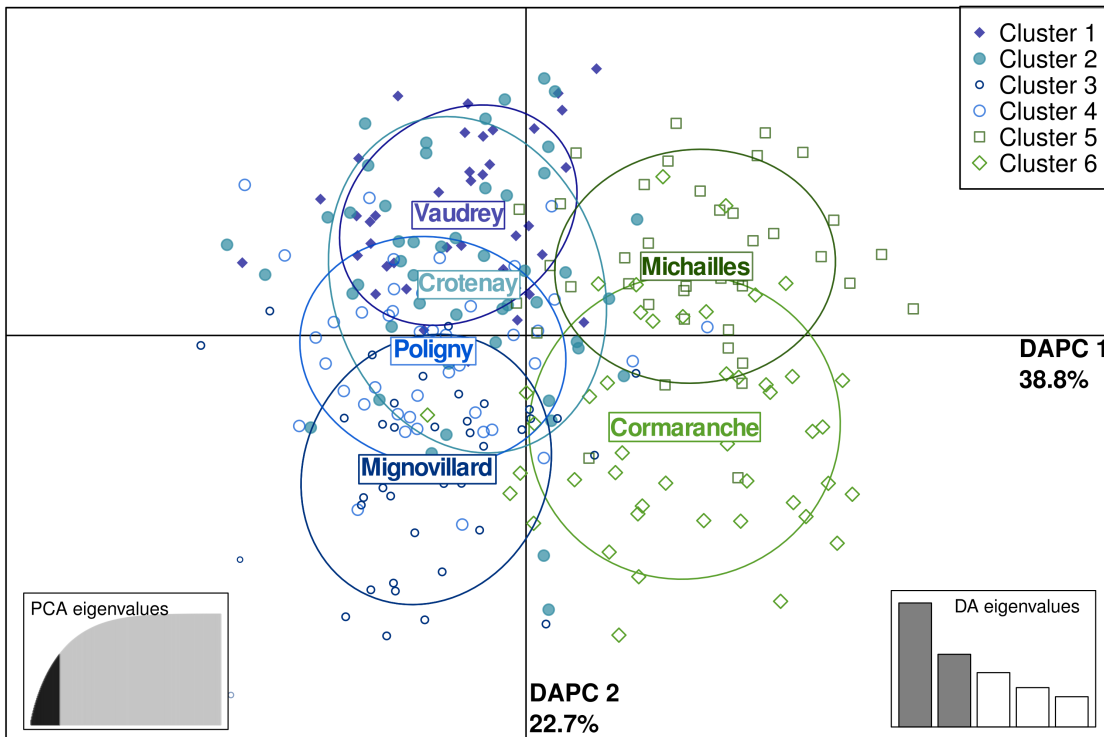

**Fig. 3.**

Variations of immunological characteristics in natural bank vole populations. a) Variations of *Mx2* gene expression between individuals of the two regions, Ain (NE non-endemic region) and Jura (NE endemic region). b) Variations of *Tlr7* gene expression between males and females. c) and d) Variations of *Tnf- $\alpha$*  gene expression between the two regions and between sex within the two regions.

a)

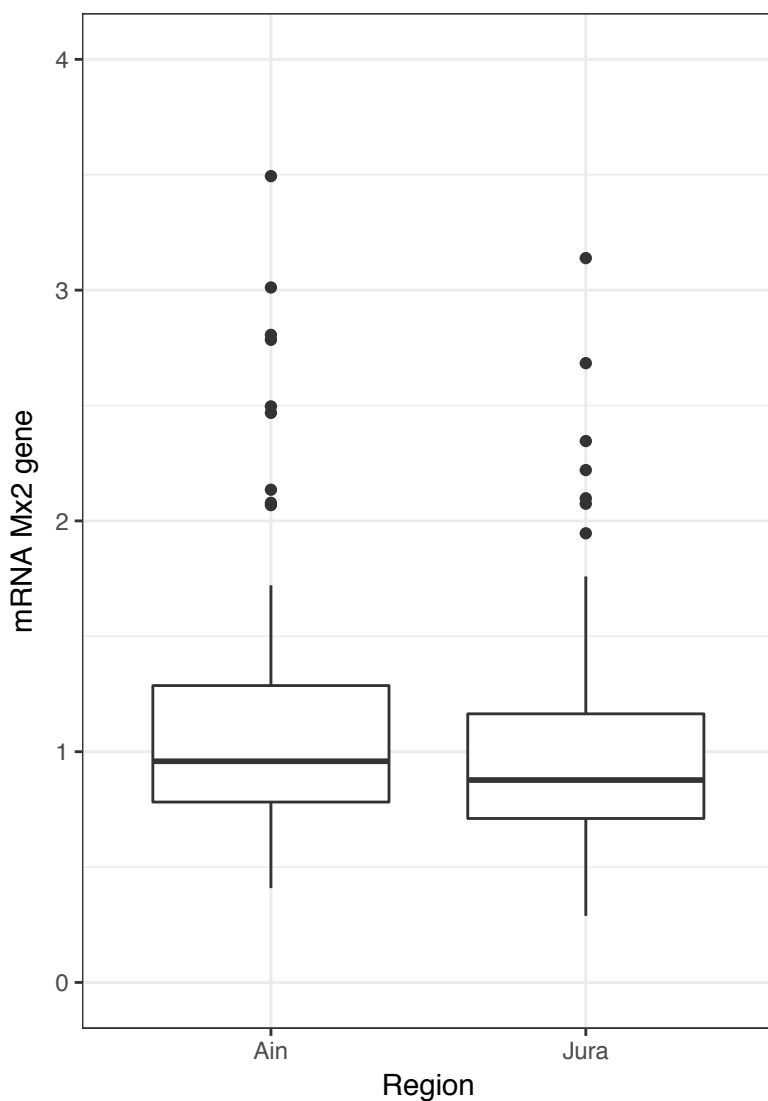

b)

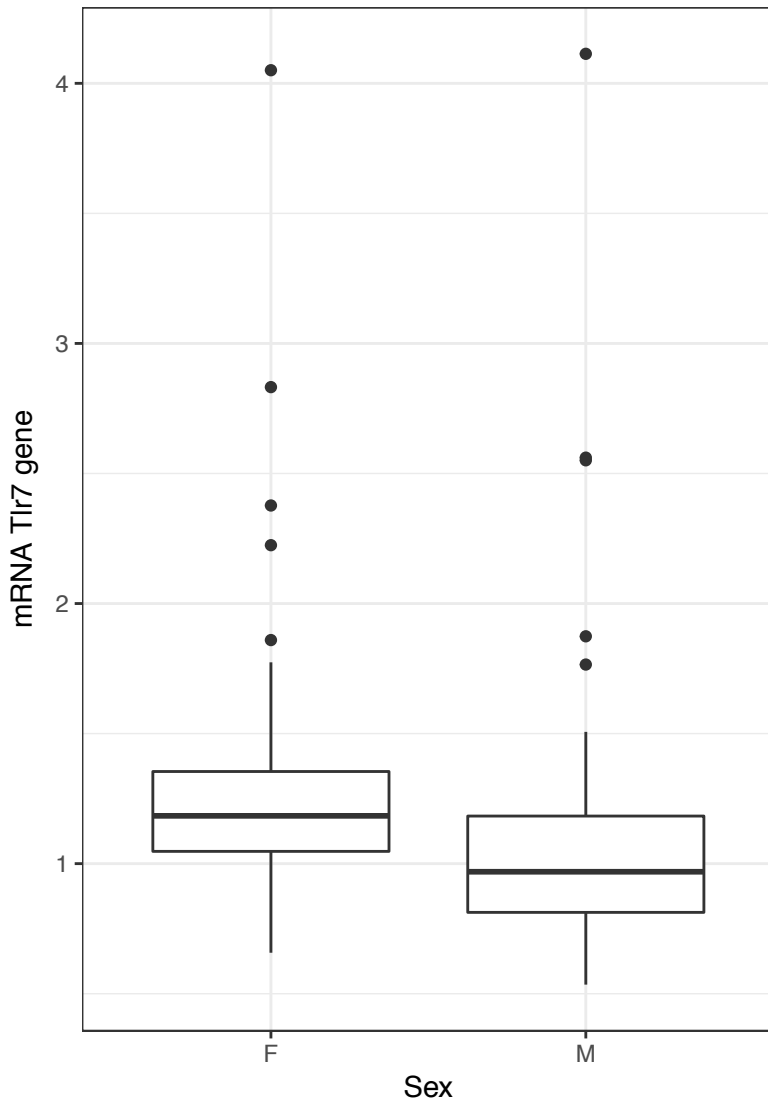

c)



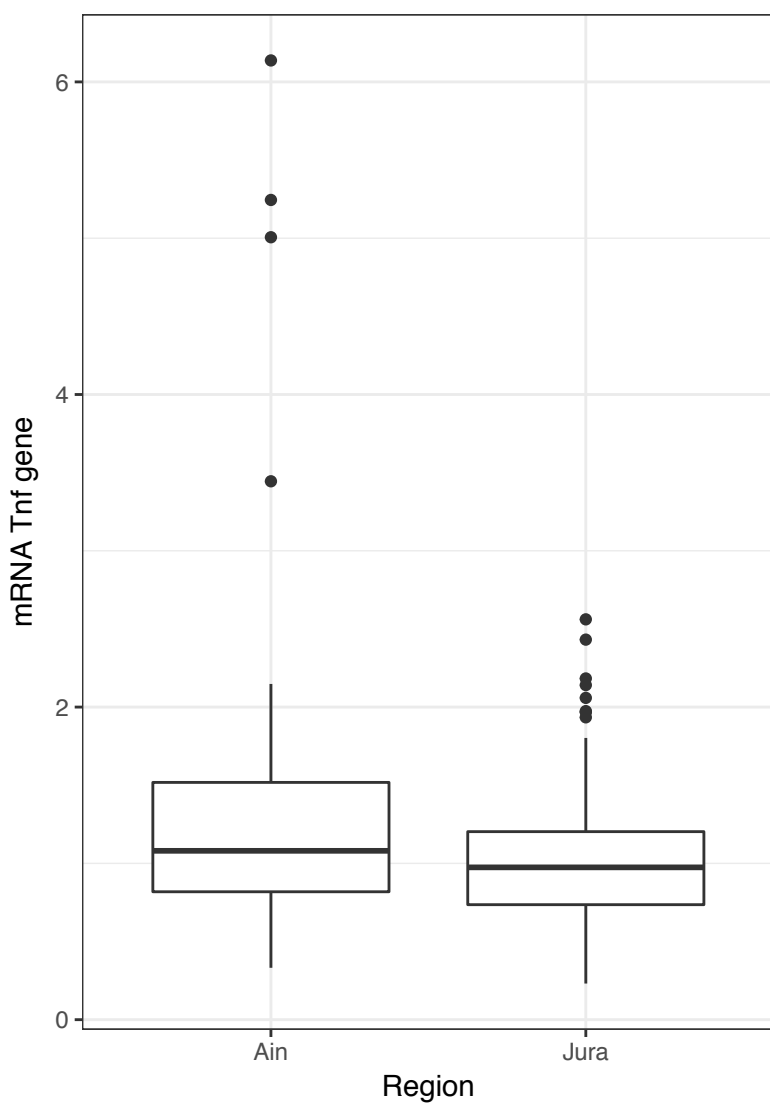

d)

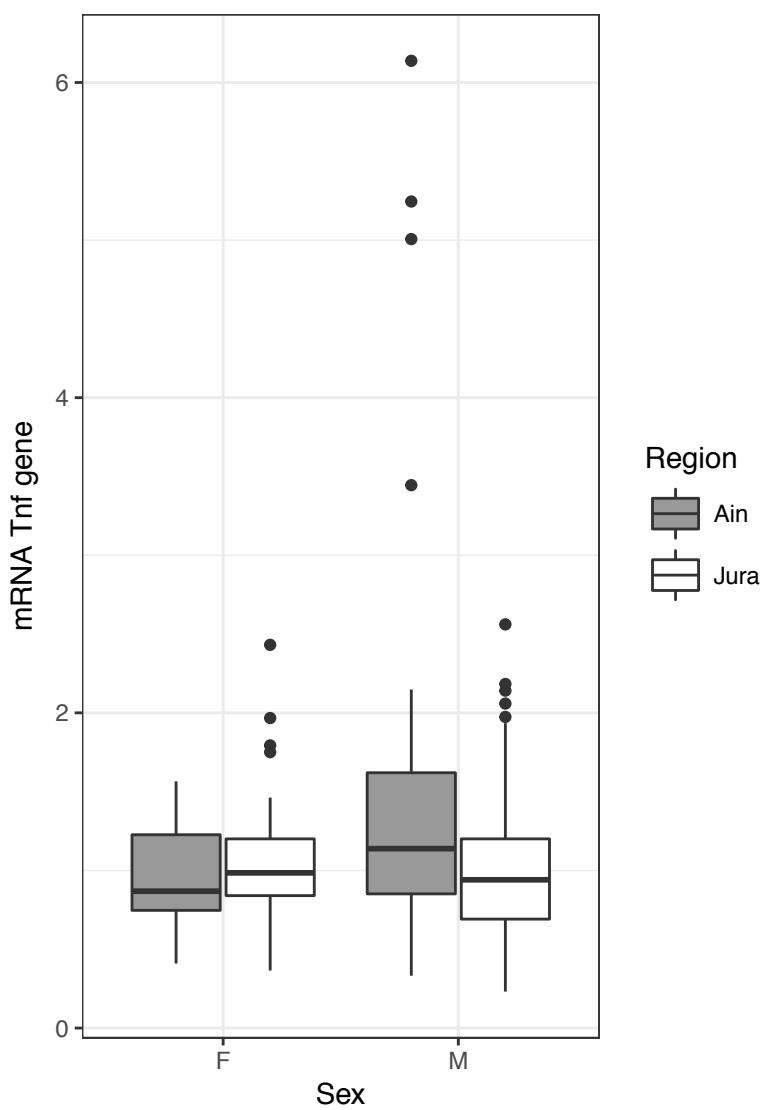

**Fig. 4.**

Variation of the optical density ( $OD_{450nm}$ ) over time for the 14 bank voles that seroconverted during the experimental infections. Barplots and error bars represent the mean  $OD_{450nm}$  value  $\pm$  SD for all the individuals in each region. The hatched line represents the threshold above which the bank voles were considered to be PUUV seropositive.

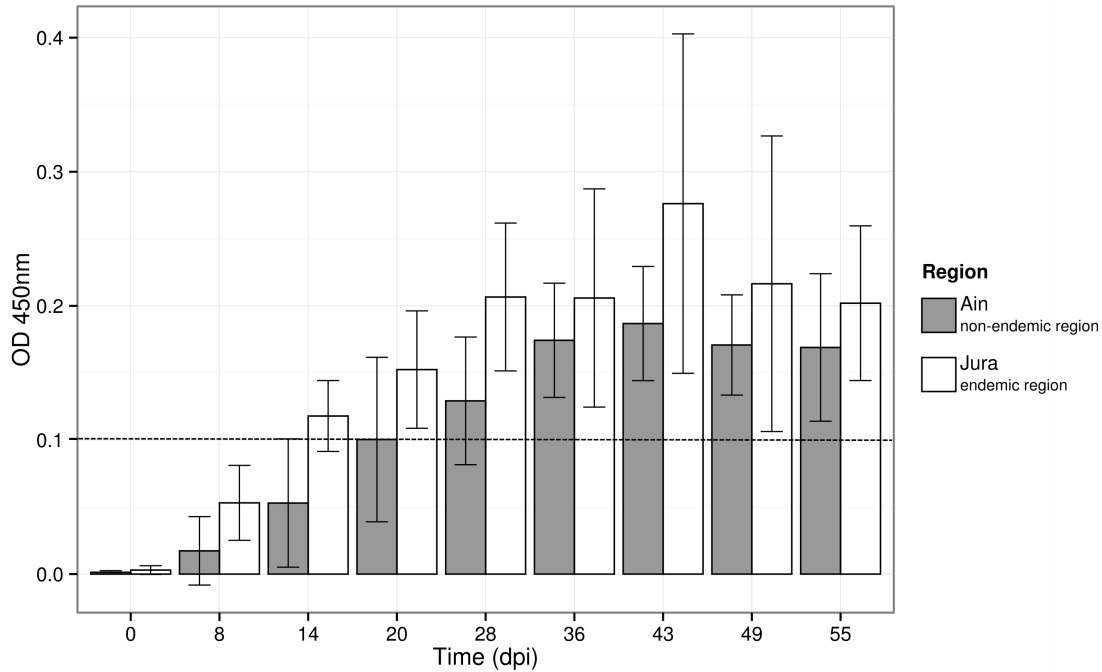

**Supplementary Table 1. Sequences of primers and probes and cycling conditions of quantitative and nested RT-PCR.**

| Method              | Primer and probe name and sequence (5' to 3') | Cycling steps         | Temperature (°C) | Time       | Number of cycles |
|---------------------|-----------------------------------------------|-----------------------|------------------|------------|------------------|
| Quantitative RT-PCR | Primer PUU R<br>(CCKGGACACAYCATCTGCCAT)       | Reverse transcription | 50               | 30 minutes | 1                |
|                     | Primer PUU F<br>(GARRTGGACCCRGATGACGTTAA)     | Hot Start activation  | 95               | 10 minutes | 1                |
|                     | Probe PUU 1<br>(CAACAGACAGTGTCAGCA)           | Denaturation          | 95               | 15 seconds | 45               |
|                     | Probe PUU 2<br>(CAACARACAGTGTCAGCA)           | Annealing /Extension  | 60               | 60 seconds | 45               |
|                     |                                               | Cooling               | 40               | 30 seconds | 1                |
|                     |                                               |                       |                  |            |                  |
| RT-PCR              | Primer PPT334C<br>(TATGGIAATGTCCTTGATGT)      | Reverse transcription | 50               | 60 minutes | 1                |
|                     |                                               | Denaturation          | 94               | 2 minutes  | 40               |
|                     |                                               | Annealing             | 44               | 60 seconds | 40               |
|                     | Primer PPT986R<br>(GCACAIGCAAAIACCCA)         | Extension             | 68               | 2 minutes  | 40               |
|                     |                                               | Final elongation      | 68               | 7 minutes  | 1                |

**Supplementary Table 2.** Detection of PUUV RNA in sera, lung, liver and urinea of the 10 adult seropositive bank voles detected in natural populations.

| Region | Individual number | Sera (RNAcopies. $\mu\text{l}^{-1}$ ) | Lung (RNA copies. $\text{mg}^{-1}$ ) | Liver (RNA copies. $\text{mg}^{-1}$ ) | Urine (RNA copies. $\mu\text{l}^{-1}$ ) |
|--------|-------------------|---------------------------------------|--------------------------------------|---------------------------------------|-----------------------------------------|
| Jura   | NCHA00014         | N                                     | 1.21e8                               | 3.42e7                                | N                                       |
|        | NCHA00041         | N                                     | 7.27e8                               | 1.95e7                                | N                                       |
|        | NCHA00071         | 8.90e4                                | 7.13e8                               | 5.79e8                                | N                                       |
|        | NCHA00073         | 1.91e4                                | 6.61e8                               | 8.09e7                                | x                                       |
|        | NCHA00086         | 2.61e4                                | 9.72e7                               | 3.93e8                                | x                                       |
|        | NCHA000143        | N                                     | 7.50e6                               | 1.79e6                                | x                                       |
|        | NCHA000150        | 1.01e4                                | 1.35e8                               | 1.48e8                                | x                                       |
|        | NCHA000178        | 1.33e6                                | 4.88e9                               | 8.63e8                                | 2.26e4                                  |
|        | NCHA000180        | 1.58e5                                | 3.29e8                               | 6.94e8                                | x                                       |
|        | NCHA000181        | 6.77e4                                | 8.33e7                               | 7.00e7                                | 2.08e4                                  |

x : samples not available. N indicates that the qRT-PCR has been done but the cycle threshold was too high (above 45).

**Supplementary Table 3.** Anti-PUUV antibody responses of bank voles to PUUV infection through time.

| Region             | Individual number | OD <sub>450nm</sub> |        |               |               |               |               |              |              |              |
|--------------------|-------------------|---------------------|--------|---------------|---------------|---------------|---------------|--------------|--------------|--------------|
|                    |                   | 0 dpi               | 8 dpi  | 14 dpi        | 20 dpi        | 28 dpi        | 36 dpi        | 43 dpi       | 49 dpi       | 55 dpi       |
| non-endemic<br>Ain | 15.129_63         | 0.0000              | 0.0050 | 0.0700        | 0.0890        | <b>0.1270</b> | <b>0.2440</b> | <b>0.258</b> | <b>0.24</b>  | <b>0.264</b> |
|                    | 15.129_67         | 0.0010              | 0.0025 | 0.0000        | <b>0.1090</b> | <b>0.1640</b> | <b>0.1510</b> | <b>0.155</b> | <b>0.144</b> | <b>0.118</b> |
|                    | 15.129_89         | 0.0000              | 0.0040 | 0.0380        | 0.0320        | 0.0750        | <b>0.1270</b> | <b>0.146</b> | <b>0.137</b> | <b>0.135</b> |
|                    | 15.129_92         | 0.0020              | 0.0210 | 0.0810        | <b>0.1430</b> | <b>0.1550</b> | <b>0.1650</b> | <b>0.217</b> | <b>0.172</b> | <b>0.196</b> |
|                    | 15.129_96         | 0.0030              | 0.0040 | 0.0050        | 0.0380        | 0.0700        | <b>0.1540</b> | <b>0.172</b> | <b>0.178</b> | <b>0.129</b> |
|                    | 15.129_98         | 0.0020              | 0.0675 | <b>0.1240</b> | <b>0.1910</b> | <b>0.1840</b> | <b>0.2050</b> | <b>0.173</b> | <b>0.154</b> | <b>0.172</b> |
|                    | 15.129_100        | 0.0030              | 0.0025 | 0.0090        | 0.0380        | 0.0850        | 0.0520        | 0.034        | 0.039        | 0.04         |
|                    | 15.129_66         | 0.0010              | 0.0310 | 0.0970        | 0.0420        | 0.0100        | 0.0150        | 0.018        | 0.028        | 0.042        |
| endemic<br>Jura    | 15.131_52         | 0.0000              | 0.0410 | 0.0850        | <b>0.1180</b> | <b>0.1120</b> | 0.0870        | 0.097        | 0.061        | 0.099        |
|                    | 15.131_53         | 0.0060              | 0.0615 | <b>0.1710</b> | <b>0.2450</b> | <b>0.2460</b> | <b>0.2950</b> | <b>0.441</b> | <b>0.405</b> | <b>0.27</b>  |
|                    | 15.131_68         | 0.0050              | 0.0600 | <b>0.1020</b> | <b>0.1490</b> | <b>0.2550</b> | <b>0.3260</b> | <b>0.467</b> | <b>0.308</b> | <b>0.241</b> |
|                    | 15.131_70         | 0.0000              | 0.0310 | <b>0.1150</b> | <b>0.1330</b> | <b>0.2580</b> | <b>0.1890</b> | <b>0.285</b> | <b>0.25</b>  | <b>0.206</b> |
|                    | 15.131_71         | 0.0070              | 0.0015 | <b>0.1310</b> | <b>0.1430</b> | <b>0.2550</b> | <b>0.2630</b> | <b>0.296</b> | <b>0.222</b> | <b>0.257</b> |
|                    | 15.131_72         | 0.0060              | 0.0925 | <b>0.1220</b> | <b>0.1830</b> | <b>0.1950</b> | <b>0.1820</b> | <b>0.235</b> | <b>0.213</b> | <b>0.198</b> |
|                    | 15.131_73         | 0.0000              | 0.0710 | 0.0950        | <b>0.1060</b> | <b>0.1680</b> | <b>0.1500</b> | <b>0.216</b> | <b>0.098</b> | <b>0.143</b> |
|                    | 15.131_74         | 0.0000              | 0.0665 | <b>0.1220</b> | <b>0.1430</b> | <b>0.1640</b> | <b>0.1550</b> | <b>0.173</b> | <b>0.175</b> | <b>0.202</b> |

The amount of anti-PUUV IgG is expressed using the optical density measured at 450 nm (OD<sub>450nm</sub>). A sample is considered as seropositive when the OD<sub>450nm</sub> exceeds 0.1 (values are then indicated in bold).

The three animals that died at 28 dpi are not included in the Table.

**Supplementary Table 4.** Detection of PUUV RNA in excretas collected at 8 and 20 days post-infection using nested RT-PCR.

| Region                 | Individual number | Serological status | Sera |       | Feces |       | Saliva |       |
|------------------------|-------------------|--------------------|------|-------|-------|-------|--------|-------|
|                        |                   |                    | 8dpi | 20dpi | 8dpi  | 20dpi | 8dpi   | 20dpi |
| Ain<br>non-<br>endemic | 15.129_63         | +                  | POS  | N     | N     | N     | N      | N     |
|                        | 15.129_67         | +                  | N    | N     | N     | N     | N      | N     |
|                        | 15.129_89         | +                  | N    | N     | N     | N     | N      | N     |
|                        | 15.129_92         | +                  | N    | N     | N     | N     | N      | N     |
|                        | 15.129_96         | +                  | N    | POS   | N     | N     | N      | N     |
|                        | 15.129_98         | +                  | N    | N     | N     | N     | N      | N     |
|                        | 15.129_100        | -                  | N    | N     | N     | N     | N      | N     |
|                        | 15.129_66         | -                  | POS  | N     | N     | N     | N      | N     |
| Jura endemic           | 15.131_52         | +                  | POS  | N     | N     | N     | N      | N     |
|                        | 15.131_53         | +                  | N    | N     | N     | N     | N      | N     |
|                        | 15.131_68         | +                  | POS  | N     | N     | N     | N      | N     |
|                        | 15.131_70         | +                  | N    | N     | N     | N     | N      | N     |
|                        | 15.131_71         | +                  | N    | N     | N     | N     | N      | N     |
|                        | 15.131_72         | +                  | POS  | N     | N     | N     | N      | N     |
|                        | 15.131_73         | +                  | POS  | N     | N     | N     | N      | N     |
|                        | 15.131_74         | +                  | N    | N     | N     | N     | N      | N     |

- indicates bank voles that did not seroconvert during the experiment; + indicates bank voles that seroconverted during the experiment. POS indicates that the nested RT-PCR enabled to amplify PUUV RNA.

**Supplementary Table 5.** Detection of PUUV RNA in organs and excretas collected 55 days after experimental infections using quantitative RT-PCR.

| Region                 | Individual number | Serological status | Sera | Lung   | Liver  | Kidney | Saliva | Urine | Feces  |
|------------------------|-------------------|--------------------|------|--------|--------|--------|--------|-------|--------|
| Ain<br>non-<br>endemic | 15.129_63         | +                  | N    | 4.07e7 | 3.07e6 | 1.76e6 | N      | N     | N      |
|                        | 15.129_67         | +                  | N    | 4.34e5 | N      | N      | N      | N     | N      |
|                        | 15.129_89         | +                  | N    | 5.03e6 | 1.11e6 | 1.48e6 | N      | N     | N      |
|                        | 15.129_92         | +                  | N    | N      | N      | N      | N      | N     | N      |
|                        | 15.129_96         | +                  | N    | 3.32e6 | 1.69e6 | 1.71e7 | N      | N     | 1.64e7 |
|                        | 15.129_98         | +                  | N    | 4.89e6 | N      | 8.59e5 | N      | N     | N      |
|                        | 15.129_100        | -                  | N    | N      | N      | N      | N      | N     | N      |
|                        | 15.129_66         | -                  | N    | 7.65e6 | N      | 9.58e6 | N      | N     | N      |
| Jura endemic           | 15.131_52         | +                  | N    | 1.03e7 | N      | N      | N      | N     | N      |
|                        | 15.131_53         | +                  | N    | 6.35e6 | N      | 2.00e6 | N      | N     | 3.55e6 |
|                        | 15.131_68         | +                  | N    | 3.54e6 | N      | 5.30e5 | N      | N     | N      |
|                        | 15.131_70         | +                  | N    | 4.30e6 | N      | N      | N      | N     | N      |
|                        | 15.131_71         | +                  | N    | 3.17e7 | 1.32e6 | 6.50e5 | N      | N     | N      |
|                        | 15.131_72         | +                  | N    | 8.90e5 | N      | 5.19e5 | N      | N     | N      |
|                        | 15.131_73         | +                  | N    | N      | N      | 4.35e5 | N      | N     | N      |
|                        | 15.131_74         | +                  | N    | 5.74e5 | N      | N      | N      | N     | N      |

- indicates bank voles that did not seroconvert during the experiment; + indicates bank voles that seroconverted during the experiment. Viral RNA is expressed in RNA copies. mg<sup>-1</sup>. N indicates that the qRT-PCR has been done but the cycle threshold was too high (above 45).
